1  
2 **Modeling in yeast how rDNA introns slow growth and increase desiccation tolerance in lichens**

3 Daniele Armaleo<sup>1</sup> and Lilly Chiou<sup>1,2</sup>

4 <sup>1</sup>Department of Biology, Duke University, Durham, North Carolina 27708, USA

5 <sup>2</sup>Curriculum in Genetics and Molecular Biology, University of North Carolina at Chapel Hill,  
6 Chapel Hill, North Carolina 27599, USA

7  
8 **Abstract**

9 We define a molecular connection between ribosome biogenesis and desiccation tolerance in  
10 lichens, widespread symbioses between specialized fungi (mycobionts) and unicellular phototrophs.  
11 Our experiments test whether the introns present in the nuclear ribosomal DNA of lichen  
12 mycobionts contribute to their anhydrobiosis. Self-splicing introns are found in the rDNA of several  
13 eukaryotic microorganisms, but most introns populating lichen rDNA are unable to self-splice,  
14 being either degenerate group I introns lacking the sequences needed for catalysis, or spliceosomal  
15 introns ectopically present in rDNA. Although all introns are eventually removed from rRNA by  
16 the splicing machinery of the mycobiont, Northern analysis of its RNA indicates that they are not  
17 removed quickly during rRNA transcription but are still present in early post-transcriptional  
18 processing and ribosome assembly stages, suggesting that delayed splicing interferes with ribosome  
19 assembly. To study the phenotypic repercussions of lichen introns in a model system, we used  
20 CRISPR to introduce a spliceosomal intron from the rDNA of the lichen fungus *Cladonia grayi* into  
21 all nuclear rDNA copies of the yeast *Saccharomyces cerevisiae*, which lacks rDNA introns. Three  
22 intron-bearing yeast mutants were constructed with the intron inserted either in the 18S rRNA  
23 genes, the 25S rRNA genes, or in both. The mutants removed the introns correctly but had half the  
24 rDNA genes of the wildtype strain, grew 4.4 to 6 times slower, and were 40 to 1700 times more  
25 desiccation tolerant depending on intron position and number. Intracellular trehalose, a disaccharide  
26 implicated in desiccation tolerance, was detected, but at low concentration. Overall, our data  
27 suggest that the constitutive interference of the intron splicing machinery with ribosome assembly  
28 and the consequent lowering of the cytoplasmic concentration of ribosomes and proteins are the  
29 primary causes of slow growth and increased desiccation tolerance in the yeast mutants. The  
30 relevance of these findings for slow growth and desiccation tolerance in lichens is discussed.

31

32 **Keywords**

33 Desiccation tolerance, rDNA introns, rRNA processing, Ribosome assembly, Lichen fungi,  
34 *Cladonia grayi*, *Saccharomyces cerevisiae*, Trehalose, CRISPR

35

36

37

## 38 Introduction

39

40 In the study of desiccation tolerance, special attention has been devoted recently to  
41 anhydrobiotes, organisms that can survive losing more than 99% of their water (LEPRINCE AND  
42 BUITINK 2015; KOSHLAND AND TAPIA 2019). We focus here on ribosome biogenesis as a key node  
43 in the control of desiccation tolerance in lichens, stable anhydrobiotic symbioses between  
44 specialized fungi (mycobionts) and unicellular green algae or cyanobacteria (photobionts).  
45 Transcriptomic analyses addressing lichen desiccation tolerance suggest ribosomal involvement  
46 (JUNTTILA *et al.* 2013; WANG *et al.* 2015). Several ribosomal assembly and translation functions  
47 appear to be under purifying selection in the lichen *Cladonia grayi* (ARMALEO *et al.* 2019)  
48 suggesting that they play pivotal roles in the anhydrobiotic lichen symbiosis. In yeast, ribosomal  
49 network regulation is central to the Environmental Stress Response (ESR) (GASCH *et al.* 2000) and  
50 mutations hindering ribosomal assembly enhance desiccation tolerance (WELCH *et al.* 2013).

51 Lichen anatomy is complex for microorganisms (HONEGGER 2012) but lacks the water  
52 management systems found in plants, such as roots, vascular tissues or waxy cuticles. Lichens  
53 employ water-storing polysaccharides and evaporation barriers like cortices, hydrophobins, and  
54 secondary compounds to slow down water loss but eventually, within minutes or hours of drying  
55 depending on conditions, residual metabolism and transcription come to a complete halt throughout  
56 their thalli (JUNTTILA *et al.* 2013; WANG *et al.* 2015; CANDOTTO CARNIEL *et al.* 2020). Yet lichens  
57 can survive losing more than 95% of their water content and remaining dehydrated for long periods  
58 of time, a stress that would kill most organisms (KRANNER *et al.* 2008). This is in contrast with non-  
59 lichenized fungi, which spend most of their life cycles protected within their substrates and survive  
60 desiccation through spores. This work focuses exclusively on mycobionts. For a review of lichen  
61 desiccation tolerance which includes photobionts, see (GASULLA *et al.* 2021).

62 Frequent desiccation and rehydration induce protein denaturation and aggregation as well as  
63 the formation of reactive oxygen species (ROS) that can cause direct damage to DNA, proteins, and  
64 lipids. Antioxidants and ROS-processing enzymes, common defenses against stress, are thought to  
65 protect also lichens from desiccation damage (KRANNER *et al.* 2008). However, the ability of  
66 lichens to repeatedly withstand extreme desiccation suggests the involvement of additional defense  
67 mechanisms. Thus, we hypothesized (ARMALEO *et al.* 2019) that the many rDNA introns present in  
68 lichen fungi (DEPRIEST 1993; GARGAS *et al.* 1995; BHATTACHARYA *et al.* 2000; BHATTACHARYA *et al.*  
69 2002) may provide such an extra defense through their effects on ribosome biogenesis.

70 The introns relevant to this work are spliceosomal introns and group I introns. Spliceosomal introns,  
71 universal among eukaryotes, are normally associated with Polymerase II transcription of protein-  
72 coding genes, require specialized host factors to be excised, and perform important regulatory roles  
73 (POVERENNAYA AND ROYTBERG 2020). Group I introns are found mostly in the ribosomal DNA of a  
74 number of eukaryotic microorganisms, and normally form ribozymes able to fold into a conserved  
75 structure that catalyzes self-splicing from the transcript without the aid of host factors *in vitro*  
76 (CECH 1990), although self-splicing can be aided by maturase proteins facilitating proper folding of  
77 the RNA *in vivo* and *in vitro* (LAMBOWITZ *et al.* 1999). Experiments with the self-splicing group I  
78 intron from the ciliate *Tetrahymena thermophila* in its original host or transferred into yeast rDNA  
79 have shown that the intron splices itself co-transcriptionally within seconds (BREHM AND CECH  
80 1983), and that 99% of the introns are removed before the end of 35S pre-rRNA transcription  
81 (JACKSON *et al.* 2006), which takes ~2 minutes per molecule in yeast (OSHEIM *et al.* 2004). Intron  
82 presence has no discernible consequences on growth rate (LIN AND VOGT 1998) or other phenotypes  
83 (NIELSEN AND ENGBERG 1985). This is why group I introns are commonly considered harmless

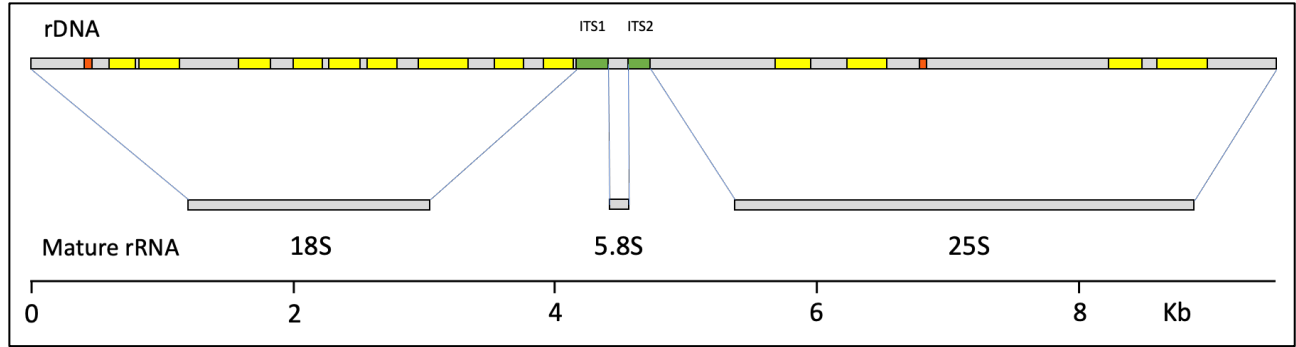

84  
85  
86 **Figure 1.** Introns in the rDNA of a single-spore isolate from the lichen fungus *Cladonia grayi* (ARMALEO *et al.* 2019). Top:  
87 the 18S, 5.8S, and 25S region of one rDNA repeat; gray, rRNA coding sequences; green, internal transcribed spacers;  
88 yellow, group I introns; orange, spliceosomal introns. Middle: the three mature rRNAs produced from this region. Bottom:  
89 scale in kilobases. Sequences were retrieved from <https://mycocosm.jgi.doe.gov/Clagr3/Clagr3.info.html>.

90  
91 genetic parasites, including the relatively few group I introns found in the rDNA of non-lichen  
92 fungi (HAUGEN *et al.* 2004b; HEDBERG AND JOHANSEN 2013). Compared to non-lichen fungi, the  
93 rDNA of lichen mycobionts contains many group I introns (Fig.1) and a few ectopic spliceosomal  
94 introns (BHATTACHARYA *et al.* 2000) which normally operate only in mRNA.

95 Lichen group I introns tested *in vitro* were found to be “degenerate”, *i.e.* unable to self-  
96 splice (DEPRIEST AND BEEN 1992; HAUGEN *et al.* 2004b). This lack of self-splicing has remained a  
97 puzzling observation which we reframe here as a central feature of lichen rDNA introns and a  
98 fundamental key to interpret our yeast results and extrapolate them to lichens. To this end, Figure 2  
99 combines self-splicing data across several lichen and non-lichen fungi with their group I intron  
100 lengths and includes also group I introns lengths from other microbial eukaryotes. Lichen group I  
101 introns, in which all self-splicing tests were negative, are the shortest and lack an average of 100  
102

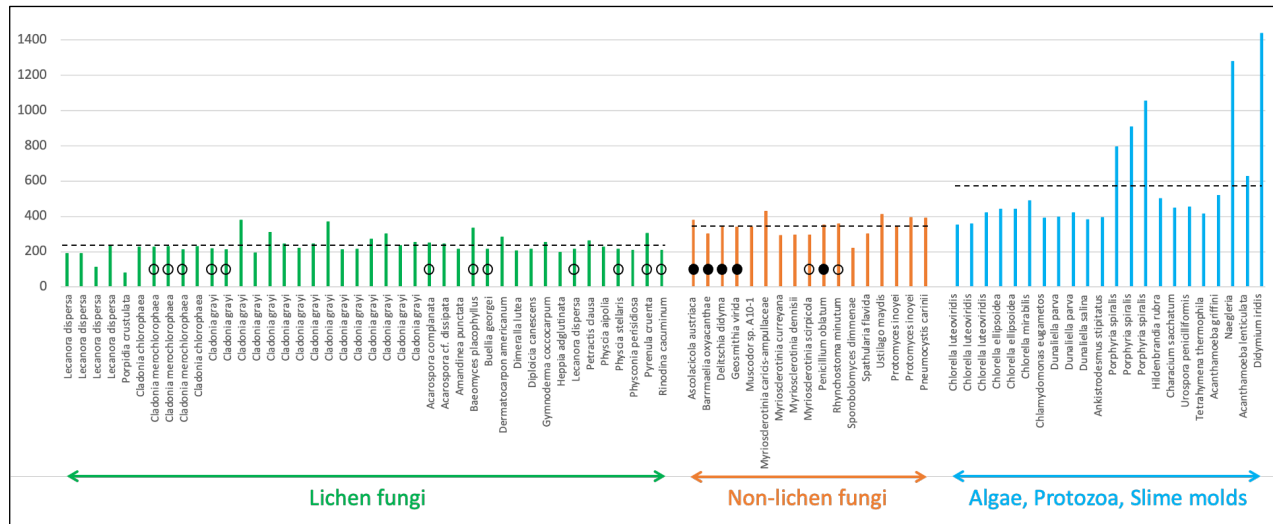

103  
104  
105 **Figure 2.** Length and splicing comparisons between group I introns from lichen and non-lichen fungi. Each colored  
106 vertical bar represents the length of an intron (nucleotide number on the ordinate). Dotted lines represent the average  
107 intron lengths within each of the three groupings (233, 339, and 586 nucleotides respectively). Introns tested for self-  
108 splicing *in vitro* by (DEPRIEST AND BEEN 1992) and (HAUGEN *et al.* 2004b) are highlighted with open circles (no splicing)  
109 or filled circles (splicing). Length data were compiled from (GARGAS *et al.* 1995), (HAUGEN *et al.* 2004b), (ARMALEO  
110 *et al.* 2019). This is not a comprehensive compilation of all available group I intron data.

111 nucleotides relative to group I introns from non-lichen fungi. The lost sequences have been shown  
112 to be necessary for catalysis (HAUGEN *et al.* 2004b). Since such degenerate introns are completely  
113 removed from mature rRNA (Fig. 1), a specific group I intron splicing machinery must have  
114 evolved in lichens. Since spliceosomal introns require spliceosomes for removal, the need for a  
115 dedicated splicing machinery is a characteristic shared in lichens by group I and spliceosomal  
116 rDNA introns. There are occasional self-splicing group I introns in lichen fungi (HAUGEN *et al.*  
117 2004a; REEB *et al.* 2007), which would quickly splice themselves out of any significant interference  
118 with rRNA processing. Those rare cases do not negate that loss of self-splicing is a prevalent  
119 feature of lichen rDNA introns.

120 The hypothesis prompting us to test the effect of lichen introns on desiccation tolerance is  
121 that the splicing machinery necessary to remove them from nascent rRNA interferes with rRNA  
122 processing and ribosome assembly (Fig. 3), leading to slow growth and to increased desiccation  
123 tolerance. A Northern analysis of intron splicing in the cultured lichen mycobiont *Cladonia grayi*  
124 supports that hypothesis. To test in a model system the effects of non-self-splicing introns on  
125 growth and desiccation tolerance, we used CRISPR to transfer a spliceosomal rDNA intron (first on  
126 left in Figure 1) from the lichen *Cladonia grayi* into all 150 rDNA repeats of *S. cerevisiae* (CHIOU  
127 AND ARMALEO 2018), which lacks rDNA introns. We inserted the intron at two yeast rDNA sites  
128 occupied by introns in *C. grayi* (Figure 3 shows the intron inserted at the 18S site). Three intron-  
129 bearing mutants were constructed, with the intron stably inserted either in all copies of the 18S  
130 rRNA gene, of the 25S rRNA gene, or of both. Among wild type and mutant strains, we compared  
131 ribosomal DNA repeat number, growth rates, desiccation tolerance, cell morphology and  
132 intracellular concentration of trehalose, a disaccharide associated with desiccation resistance in  
133 yeast and other organisms (KOSHLAND AND TAPIA 2019). The main effects of the introduced introns  
134 were dramatic decreases in growth rate and equally significant increases in desiccation resistance.  
135

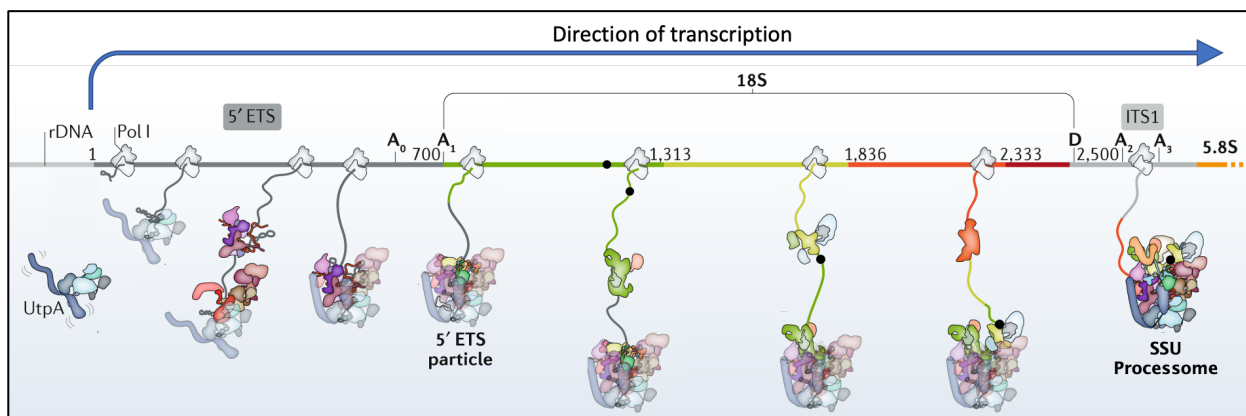

136  
137  
138 **Figure 3.** Visualization of how delayed intron splicing could interfere with ribosome assembly. The scheme depicts early  
139 nucleolar phases of the cotranscriptional assembly of yeast 18S pre-ribosomal particles. From the start of transcription,  
140 several assembly factors interact dynamically with the nascent rRNA, initiating ribosome construction. The grey parts of  
141 the nascent RNA correspond to the 5' ETS and ITS1, the colored parts to the mature 18S rRNA. The spliceosomal intron  
142 we inserted into the yeast 18S rDNA is depicted as a proportionally sized black dot located on the DNA and incorporated  
143 upon transcription into the growing pre-ribosomal particle. The bulky and relatively slow spliceosome (not depicted here,  
144 but comparable in size to the processome) removing the intron is expected to interfere with ribosome assembly, delaying  
145 it. We depicted the intron as persisting up to the processome stage (as inferred from a Northern blot involving a different  
146 18S intron; see Results). A similar interference by the intron is expected to delay maturation of 25S pre-ribosomal  
147 particles (not shown). The diagram was modified from (KLINGE AND WOOLFORD 2019) with permission.  
148

## 149 **Materials and Methods**

### 150 **Plasmids, strains, and media**

151 The lichen mycobiont used for the Northern is the *C. grayi* single-spore isolate  
152 Cgr/DA2myc/ss (ARMALEO *et al.* 2019), routinely propagated on MY medium (HAMADA 1996).  
153 DH5 $\alpha$  *E. coli* cells containing the plasmid pCAS were obtained from Addgene (#60847). Plasmid  
154 pCAS (8.7 Kb) is a kanamycin/G418 shuttle vector carrying the gene for Cas9 and a generic guide  
155 RNA expression cassette (RYAN AND CATE 2014). Competent *E. coli* strain DH10B (New England  
156 Biolabs, C3019I) was used for transformations. *E. coli* was grown in LB medium (PROTOCOLS 2006)  
157 at 37°C. For *E. coli* transformant selection, kanamycin (ThermoFisher Scientific) was added to the LB  
158 medium to 100 mg/L. The yeast strain used was *S. cerevisiae* YJ0 (*MATa*, *gal4* $\Delta$ , *gal80* $\Delta$ , *ura3*-52,  
159 *leu2*-3, *112 his3*, *trp1*, *ade2*-101) (STAFFORD AND MORSE 1998), and was typically grown in YEPD  
160 medium (PROTOCOLS 2010) at 30°C. To select for yeast containing the transforming plasmid, G418  
161 (VWR) was added to the plate medium to 200 mg/L.

### 162 **Northern of group I intron splicing in the lichen fungus**

163 To prepare total genomic RNA, small volumes of a *C. grayi* mycobiont liquid culture were  
164 seeded onto 47-mm diameter, 20  $\mu$ m pore size Nylon filters. Filters were placed on MY plates and the  
165 mycobiont was grown for 1 month at room temperature. Dry weight of mycelia per filter was  
166 determined separately, two fresh filters (total dry weight equivalent  $\sim$  10 mg) were removed from  
167 plates, wetted in RNAlater (Ambion), mycelia were scraped off, pooled, and total genomic RNA was  
168 extracted as described in (ARMALEO *et al.* 2019). Using standard Northern protocols, 1% agarose gel  
169 electrophoresis was performed with 1  $\mu$ g of total RNA per lane, and the RNA was then transferred and  
170 UV-crosslinked to a Hybond-N+ nylon membrane (Amersham). To prepare the probe, primers  
171 CgInt3F and CgInt3R (Table 1) were used to isolate by PCR (Table 2A) from *C. grayi* DNA a 109 bp  
172 fragment internal to group I intron-3 (third from left in Figure 1). The PCR fragment was cloned into  
173 the pGEM-T Easy vector (Promega), whose polycloning site is flanked by two phage promoters (T7  
174 and SP6) for RNA probe synthesis. Sequence and orientation of the insert were confirmed by  
175 sequencing. The plasmid was linearized with SacII, and SP6 polymerase was used for transcription  
176 and digoxigenin (DIG) for labeling of the intron-3 RNA antisense probe, using the Roche DIG  
177 Northern Starter Kit. The same kit was used for hybridization and signal detection on X-ray film.

### 178 **Guide sequence introduction into pCAS by inverse PCR, screening, plasmid isolation**

179 In our hands the yields were very low when we used the procedure recommended by (RYAN *et al.*  
180 2016) to introduce a desired guide sequence into pCAS. Their procedure involves PCR with two  
181 self-complementary “guide RNA” primers, followed by DpnI restriction to eliminate the original  
182 methylated plasmid before transformation. We therefore decided to update the inverse PCR  
183 procedure developed for plasmid mutagenesis by (HEMSLEY *et al.* 1989). We found that by using  
184 two primers which are not self-complementary dramatically increases product yield and eliminates  
185 the need for DpnI treatment (Fig. 4). One of the two is 60 bp long and is the mutagenic primer  
186 (GuideRNA primers in Table 1), designed according to the guidelines in (RYAN *et al.* 2016) to  
187 contain the desired 20-bp guide sequence flanked on both sides by 20-bp sequences homologous to  
188 the plasmid. The other is a normal, shorter PCR primer not overlapping with but immediately  
189 adjacent to the long primer on the plasmid sequence (Fig. 4). Using the inverse PCR method, we  
190 constructed three modified pCAS plasmids, pCAS\_SS2, pCAS\_LS7, and pCAS\_LS7nc with,  
191

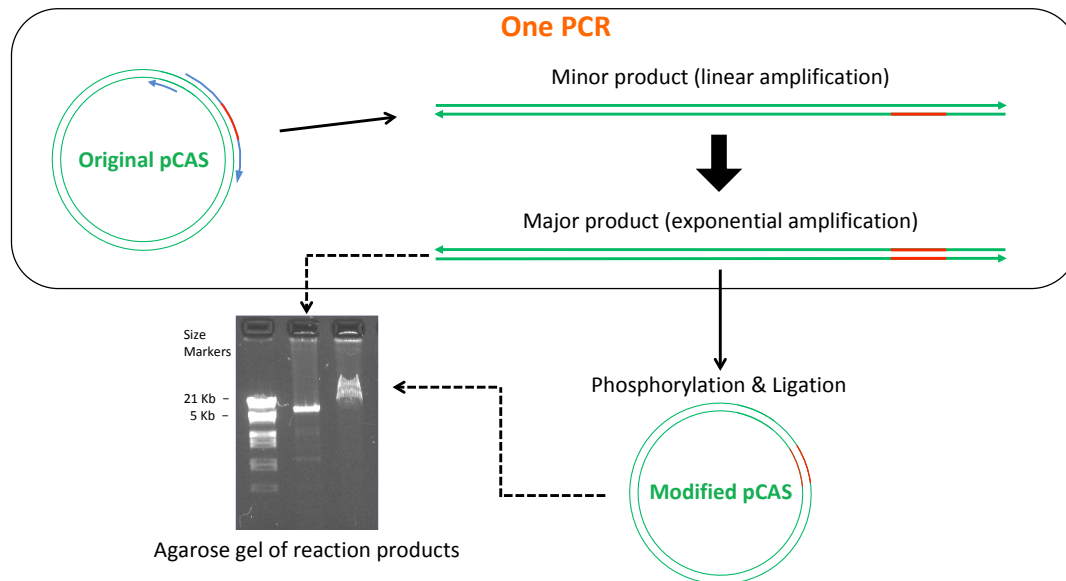

192

193 **Figure 4.** Inverse PCR is fast and efficient in modifying CRISPR guide sequences. Drawings are not to scale and primer  
 194 sizes (blue rounded arrows on original pCAS) are exaggerated relative to the size of the plasmid (green double lines). The  
 195 modified guide sequence is colored orange on primers and plasmids. Components and events in the single PCR reaction  
 196 are enclosed within the rounded rectangle at the top. Either one of the two possible primer arrangements on the original  
 197 pCAS can be chosen to create the same modification of the guide RNA. The figure depicts only one primer arrangement.  
 198 The 5' nucleotide of the 60 base-long GuideRNA primer and of the 20 or 27 base-long Extend primer (Table 1) correspond  
 199 to adjacent nucleotides on the plasmid sequence, producing full-length, blunt-ended, linear products that are directly  
 200 phosphorylated, ligated, and used in transformation. Sub-nanogram quantities of the original 8.7 Kb plasmid can yield  
 201 micrograms of modified plasmid as shown by the gel image. The very large excess of modified plasmid over the amounts  
 202 of original and minor product DNA bypasses the need to eliminate the minor DNAs before transformation, as 50% or  
 203 more of the *E. coli* transformants will have the desired guide sequence.

204  
 205 respectively, primer pairs GuideRNA\_SS2R and pCAS\_ForwExtend, GuideRNA\_LS7F and  
 206 pCAS\_RevExtend, and GuideRNA\_LS7nc and pCAS\_RevExtend (Table 1). For high fidelity PCR,  
 207 we used Phusion HF DNA Polymerase (NEB) according to the manufacturer's specifications. Each  
 208 10- $\mu$ l PCR contained 1 ng pCAS plasmid. It is important to use the relatively high dNTP  
 209 concentration in the reaction (200  $\mu$ M each) recommended by the manufacturer to avoid unwanted  
 210 deletions and mutations around the plasmid ligation junction. At lower dNTP concentrations the  
 211 3'>5' exonuclease activity of Phusion polymerase increases and could damage primer and amplicon  
 212 ends. Thermocycling conditions were as described in Table 2B. The linear PCR product (Fig. 4)  
 213 was 5' phosphorylated and blunt-end-ligated using standard protocols. Competent *E. coli* (strain  
 214 DH10B) were transformed with each of the three plasmids and plated on LB-kanamycin medium.  
 215 Colony PCR was first used to screen 10-20 transformants for the presence of the correct guide  
 216 sequence. The primers used for colony PCR (Table 1) were GuidePrimerSS2F, and pCAS\_Seq\_R  
 217 for plasmid pCAS-SS2, GuidePrimerLS7R and GuideSeq for plasmid pCAS-LS7, and GuideSeq  
 218 and pCAS\_Seq\_R2 for plasmid pCAS-LS7nc. For the first two plasmids, one primer  
 219 (GuidePrimerSS2F or GuidePrimerLS7R) was specific for the guide sequence so that a PCR  
 220 product would form only in presence of the correct guide sequence. Both primers used for plasmid  
 221 pCAS-LS7nc were flanking the guide sequence, whose correctness was then directly confirmed by  
 222 sequencing. PCR conditions were as described in Table 2D. Plasmids were isolated from  
 223 transformants, and presence of the correct gRNA sequence was confirmed by sequencing using  
 224 forward primer GuideSeq and either pCAS\_Seq\_R or pCAS\_Seq\_R2 as the reverse primer.

| Name            | Sequence                                                                                 | Function                                |
|-----------------|------------------------------------------------------------------------------------------|-----------------------------------------|
| CgInt3F         | GACGCCAGTCACAGATTGAT                                                                     | Northern probe for group I intron-3     |
| CgInt3R         | GCCTCTAAGAGACCCCTCCC                                                                     |                                         |
| CgSSint1_SS2F   | AGGGCCCATTCGGGTCTTGTAAATGGGAATGAGTACAATGTAATACCTT <b>AGTA</b> <b>GTCAAAATAATCCTTTTC</b>  |                                         |
| CgSSint1_SS2R   | GGAAATACCGGGCTGCTGGCACCAGACTTGCCTCCAATTGTTCTCTCGT <b>CTATTAATGATGTTAGTAATG</b>           |                                         |
| CgSSint1_LS7F   | AGTCCCTCGGAATTTGAGGCTAGAGGTGCCAGAAAAGTTACCACAGGGAT <b>GTAT</b> <b>GTCAAAATAATCCTTTTC</b> |                                         |
| CgSSint1_LS7R   | AGAATCAAAAAGCAATGTCGCTATGAACGCTTACTGCCACAAGCCAGTT <b>CTATTAATGATGTTAGTAATG</b>           |                                         |
| GuideRNA_SS2R   | GCTATTTCTAGCTCTAAAAC <b>CGTTAAGGTATTACATTG</b> TAAAGTCCCATTCCGCCACCCG                    | To modify the pCAS guideRNA sequence    |
| GuideRNA_LS7F   | CGGGTGGCGAATGGGACTTT <b>AAAGTTACCACAGGGATAACG</b> TTTTAGAGCTAGAAATAGC                    |                                         |
| GuideRNA_LS7ncF | CGGGTGGCGAATGGGACTTT <b>CCACAAGCCAGTTATCCCTG</b> TTTTAGAGCTAGAAATAGC                     |                                         |
| pCAS_ForwExtend | AAGTTAAAATAAGGCTAGTCCGTTATC                                                              |                                         |
| pCAS_RevExtend  | AAGGTGTTGCCAGCCGGCG                                                                      | Yeast colony PCR                        |
| YrDNA10F        | GCTCGTAGTTGAACCTTTGGGCC                                                                  |                                         |
| YrDNA18R        | GGCCCAAAGTTCACACTACGAGC                                                                  |                                         |
| Cg28S_F2        | CAGTGTGAATACAAACCATGAAAGTG                                                               |                                         |
| Cg28S_R1        | CCAACGCTTACCGAATTCTGCTTCGG                                                               |                                         |
| PCR Control F   | ACGGCGCGAAGCAAAAATTAC                                                                    | To check for plasmid loss               |
| PCR Control R   | TGCCCGACATTATCCGGAG                                                                      |                                         |
| GuidePrimerSS2F | ACAATGTAATACTTTAAGC                                                                      | Primers specific for guideRNA sequences |
| GuidePrimerLS7R | GTTATCCCTGTGGTAACTTT                                                                     |                                         |
| GuideSeq        | CGGAATAGGAACCTTCAAAGCG                                                                   | Sequencing primers                      |
| pCAS_Seq_R      | AAGCACCCGACTCGGTGCCAC                                                                    |                                         |
| pCAS_Seq_R2     | GAGGCAAGCTAAACAGATCTC                                                                    |                                         |
| Y-SSUqF2        | CACCAGGTCCAGACCAATAAG                                                                    | qPCR primers                            |
| Y-SSUqR2        | CAGACAAATCACTCCACCAACTA                                                                  |                                         |
| Y-Act1qF4       | CGTCTGGATTGGTGGTTCTATC                                                                   |                                         |
| Y-Act1qR4       | GGACCACTTTCGTCGTATTCTT                                                                   |                                         |

**Table 1.** Primers used in this study. The 3' end sequences bolded in the first set of primers anneal to the 5' and 3' end regions of the intron respectively. The T in red is a mismatch designed to modify the 5' splice site. The fifty 5' bases match the yeast rDNA flanking the Cas9 cut site. The twenty bases bolded in the second set of primers are the guide sequences for Cas9.

| A        |        | B        |        | C        |        | D        |        | E        |        | F        |        |
|----------|--------|----------|--------|----------|--------|----------|--------|----------|--------|----------|--------|
| Temp.    | Time   | Temp.    | Time   | Temp.    | Time   | Temp.    | Time   | Temp.    | Time   | Temp.    | Time   |
| 94°C     | 4 min  | 98°C     | 30 sec | 98°C     | 30 sec | 94°C     | 4 min  | 95°C     | 5 min  | 95°C     | 60 sec |
| *94°C    | 30 sec | *98°C    | 10 sec | *98°C    | 10 sec | *94°C    | 30 sec | *95°C    | 30 sec | *95°C    | 30 sec |
| 55°C     | 30 sec | 58°C     | 1 min  | 55°C     | 30 sec | 50°C     | 30 sec | 60°C     | 30 sec | 56°C     | 30 sec |
| 72°C     | 30 sec | 72°C     | 4 min  | 72°C     | 10 sec | 72°C     | 15 sec | to * 39x |        | to * 39x |        |
| to * 39x |        | to * 30x |        | to * 34x |        | to * 39x |        | 72°C     | 2 min  |          |        |
| 72°C     | 7 min  | 72°C     | 2 min  | 72°C     | 5 min  | 72°C     | 7 min  |          |        |          |        |

**Table 2.** Thermocycling conditions referred to in the text.

### Intron PCR

*Cladonia grayi* mycobiont DNA was isolated as described in (ARMALEO AND MAY 2009). The 57-bp intron (first on left in Figure 1) we chose for transfer into yeast rDNA was amplified (Phusion HF DNA Polymerase) from 5 ng *C. grayi* DNA with two primer pairs, CgSSint1\_SS2F and CgSSint1\_SS2R for insertion into the 18S (SSU) sequence, or CgSSint1\_LS7F and CgSSint1\_LS7R for insertion into the 25S (LSU) sequence (Fig. 5 and Table 1). PCR conditions are listed in Table 2C. PCR products were cleaned with a QIAquick PCR purification kit and used for yeast cotransformation with the appropriate pCAS plasmid variant. Each 157-bp PCR fragment contained the intron flanked by 50-bp segments homologous to either the small or the large subunit rDNA of yeast, to direct integration by HDR (Fig. 5). The branchpoint and 3' splice site sequences of the lichen intron match the most common consensus sequences in yeast (KUPFER *et al.* 2004), but the 5' splice site, GUAAGU, corresponds to a less frequent yeast version. To make the 5' splice site match the common consensus in yeast, GUAUGU (KUPFER *et al.* 2004), we introduced into the forward primer a one base A>T mismatch with the original lichen sequence (Fig. 5 and Table 1).

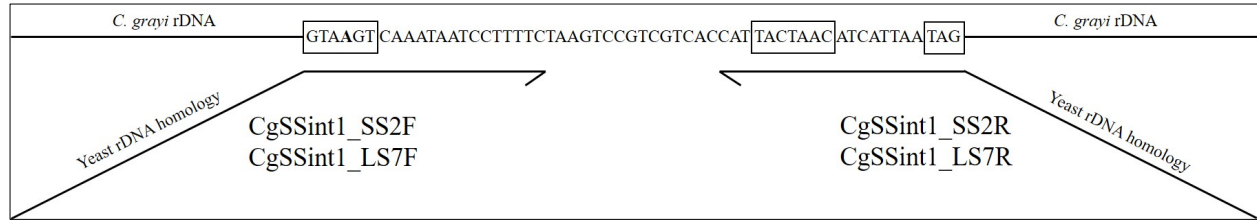

**Figure 5.** Incorporation of a *C. grayi* intron into a PCR fragment for integration into yeast rDNA. The top line shows the intron sequence within *C. grayi* rDNA. From left to right, boxes highlight the 5' splice site, branchpoint, and 3' splice site consensus sequences, respectively. The bolded A in the 5' splice site was changed to a T through primer CgSSint1\_SS2F or CgSSint1\_LS7F. The primer regions annealing to the intron are drawn parallel to the intron, with arrowheads indicating the 3' ends. Tilted are the 50-bp regions homologous to yeast rDNA, which allow intron integration by HDR into yeast rDNA cut by Cas9 within the homologous regions. Not drawn to scale.

### Yeast transformations, colony PCR, test of plasmid loss

Single intron insertion yeast strains MSS2 and MLS7 were obtained from wildtype strain YJ0 by cotransformation, respectively, with pCAS-SS2 + SSU intron fragment and pCAS-LS7nc + LSU intron fragment. The double insertion strain Md was obtained from strain MSS2 by cotransformation with pCAS-LS7 + LSU intron fragment. We also performed transformations using plasmids pCAS-SS2 or pCAS-LS7nc each by itself, to screen for small mutations around the Cas9 cut sites rather than intron insertions. The protocol by (RYAN *et al.* 2016) was followed for competent cell preparation and transformation. In each cotransformation, 100  $\mu$ l competent cells were combined with 1  $\mu$ g pCAS plasmid derivative and 5  $\mu$ g intron fragment. Transformants were selected on G418 YEPD plates incubated at 30°C. Individual transformants were screened by colony PCR using primers flanking each expected insertion/small mutation site (YrDNA10F/YrDNA18R for the small subunit and Cg28S\_F2/Cg28S\_R1 for the large subunit, Table 1) and sequencing of PCR products. Thermocycling conditions were as described in Table 2E. After prolonged growth in YEPD lacking G418, yeast transformants were checked for plasmid loss using the same colony PCR protocol with plasmid-specific primers PCR Control F and PCR Control R (Table 1). All yeast mutant strains used in the experiments had lost the Cas9 plasmid.

### Yeast RNA extraction, cDNA preparation

To demonstrate intron splicing, total RNA was extracted from the MSS2 transformant, bearing the intron in the 18S rRNA repeats. A 10 ml overnight culture was pelleted, the pellet was frozen with liquid N<sub>2</sub> and thoroughly ground in a mortar with liquid N<sub>2</sub>. Total RNA was extracted using the RNAqueous kit (ThermoFisher Scientific). RNA was quantified by NanoDrop (ThermoFisher Scientific) and quality was assessed by agarose gel electrophoresis. Using Superscript III RT (ThermoFisher Scientific), reverse transcription was performed at 50°C for 120 min in a 25  $\mu$ l volume with 100 ng RNA and the reverse primer YrDNA18R (Table 1), whose 5' end is 111 bases downstream from the intron insertion site. The cDNA was amplified with primers YrDNA10F and YrDNA18R (Table 1). PCR conditions were as described for yeast colony PCR (Table 2E). The PCR fragment sizes with and without intron are 290 and 233 bp respectively. Correct splicing was confirmed by sequencing.

### Relative rDNA copy number determination

We used qPCR to determine the relative number of rDNA copies in the mutants vs. the wildtype strain. Each strain was grown in 10 ml YEPD at 30°C to early stationary phase, and DNA was extracted (HOFFMAN AND WINSTON 1987). DNA concentration was estimated by Nanodrop



293 (ThermoFisher) and fine-tuned by measuring band intensity on gels. The change in rDNA copy  
294 number in MSS2 and MLS7 relative to YJ0 was assessed (Supplementary File 1) with the  $\Delta\Delta C_t$   
295 method as modified by (PFAFFL 2001) to allow for different amplification efficiencies between  
296 reference and target gene. As target we used a section of SSU rDNA, amplified with primers Y-  
297 SSUqF2 and Y-SSUqR2, for an amplicon size of 102 bp. As reference we used the single-copy  
298 ACT1 gene, amplified with primers Y-Act1qF4 and Y-Act1qR4, for an amplicon size of 87 bp. In  
299 each of two replicate qPCR experiments, each DNA was tested in triplicate with the SSU primers  
300 and with the ACT1 primers. Standard SybrGreen qPCR reactions were run in 96-well plates in a  
301 Bio-Rad Chromo 4 machine, with Opticon Monitor software version 3.1. Cycling conditions are in  
302 Table 2F. Amplification efficiencies, 1.55 for SSU and 1.47 for ACT1, were calculated by the  
303 Opticon Monitor software.

304

### 305 **Growth Assay**

306 Growth assays were done on YJ0, MSS2, MLS7, and Md. For each strain, a fresh agar plate  
307 culture was used to prepare a liquid suspension in YEPD with a concentration between  $10^3$ - $10^5$   
308 cells/ml, assuming an  $OD_{600}$  of  $1 = 3 \times 10^7$  cells/ml. Twelve 150  $\mu$ l aliquots of the suspension were  
309 loaded in three groups (biological replicates) of four technical replicates on two adjacent columns  
310 of a 96-round-bottom well plate. To generate growth curves, an automatic plate reader (Tecan) was  
311 used to record the  $OD_{600}$  at 30°C every 15 minutes over a period of 96 hours. The plate was shaken  
312 for 60 seconds before each measurement.

313

### 314 **Desiccation Assay**

315 We modified in two ways the method by (WELCH AND KOSHLAND 2013). Desiccation was  
316 performed in the flow hood rather than in the speedvac and colonies were counted on agar plates  
317 rather than directly in the liquid culture wells. All procedures were sterile and media were YEPD.  
318 Growth was at 30°C, and liquid cultures were shaken at 255 rpm. Fresh overnight liquid cultures of  
319 YJ0, MSS2, MLS7 and Md were diluted to an  $OD_{600}$  between 0.1 and 0.25 and grown to 0.5  $OD_{600}$ .  
320 For each strain, duplicate 1 ml aliquots were pelleted in microfuge tubes. Pellets were resuspended  
321 in 1 ml of H<sub>2</sub>O, re-pelleted, and all the water was carefully removed with a pipette. One of the  
322 duplicate aliquots (designated as “undesiccated”) was immediately resuspended in 100  $\mu$ l medium,  
323 serially diluted 10x, and three 5  $\mu$ l replicates from each dilution were spotted on an agar plate. The  
324 other duplicate aliquot (“desiccated”) was laid against the sterile air flow in a laminar flow hood to  
325 dry for 24 hours, resuspended in 100  $\mu$ l medium, serially diluted and plated the same way as the  
326 undesiccated replicate. The number of survivors in each case was estimated by counting colonies at  
327 the highest countable dilutions and extrapolating to the number of viable cells in the starting  
328 suspension. Desiccation resistance was defined as the fraction of viable cells in the desiccated vs.  
329 undesiccated sample. Three to six biological repeats were performed with each strain. P-values  
330 were calculated with a two-sided Student’s t-test.

331

### 332 **Microscopy**

333 Budding frequency was measured in a haemocytometer with samples from mid-log phase  
334 cultures in YEPD liquid medium. For photography, diluted cell suspensions were plated on YEPD  
335 and incubated at 30°C. The YJ0 wildtype was photographed after overnight growth, the mutants  
336 after 48-72 hrs. A 1.5 x 1.5 square of agar was cut out of the plate, placed onto a microscope slide,  
337 and 10  $\mu$ l water were placed on the surface followed by a cover slip.

338  
339 **Intracellular trehalose measurement**  
340 The method was essentially as described by (TAPIA *et al.* 2015), and (GIBNEY *et al.* 2015).  
341 Each strain was grown at 30°C in YEPD liquid medium to an OD<sub>600</sub> between 0.3 and 0.5. A volume  
342 containing 10<sup>7</sup> cells was harvested, cells were pelleted, resuspended in 2 ml ice-cold water and re-  
343 pelleted. Each pellet was resuspended in 250 µl of 0.25 M sodium carbonate, and the suspension  
344 was transferred to a 2-ml screwcap tube and stored at -80°C until trehalose extraction. Trehalose was  
345 extracted from cells by incubating the tightly sealed samples at 98°C for 4 hours, with occasional  
346 mixing. Samples were stored at -20°C. For trehalase treatment, each 250 µl sample was mixed with  
347 150 µl of 1M acetic acid and 600 µl 0.2 M sodium acetate, cell debris were pelleted, and 250 µl  
348 were removed from the top of the sample and stored at -20°C (untreated control). To the remaining  
349 750 µl, 0.35 µl trehalase (Megazyme, at 4.2 units/µl) were added for a final concentration of 2  
350 units/ml, and reactions were incubated overnight at 37°C on a rotating wheel. After pelleting cell  
351 debris, the supernatant (750 µl) was transferred to a new tube to be assayed for glucose either  
352 immediately or, if convenient, after storage at -20°C, using the Glucose (GO) assay kit from Sigma  
353 Aldrich. For each assay, 220 µl of sample were mixed with 440 µl kit reagent in a 15-ml glass test  
354 tube, capped and incubated at 37°C for 30 minutes, and 440 µl of 6M sulfuric acid were added in a  
355 fume hood with a 1-ml glass pipette. Absorbance at 540 nm was measured in 1-ml plastic cuvettes.  
356 The untreated controls were used to measure background glucose, water samples were used as  
357 blanks and glucose standards to determine concentration.

358

359

## 360 **Results**

361

### 362 **In the lichen mycobiont, a group I intron is still present in a post-transcriptional rRNA** 363 **processing intermediate**

364 We assessed by Northern the *in vivo* splicing pattern of intron-3, a group I intron located in  
365 the 18S gene of the *C. grayi* lichen fungus (the third from left in Figure 1). Total RNA extracted  
366 from the mycobiont grown on MY plates was run on a gel, transferred onto a membrane, and  
367 hybridized to an intron-3 specific probe (Fig. 6A). The Northern blot showed two RNAs reacting  
368 with the probe, one at ~0.3 Kb and one at ~3Kb. The 0.3 Kb band corresponds to the size of the  
369 spliced 310-base intron. The 3 Kb band, significantly larger than the mature 18S rRNA, shows that  
370 intron-3 is still present in a post-transcriptional rRNA processing intermediate. The slight smear  
371 under the 3 Kb band indicates that it is being partly degraded. The 3 Kb intermediate is likely to be  
372 the mycobiont analog of a major yeast 18S rRNA precursor known as “23S” (KLINGE AND  
373 WOOLFORD 2019), which includes the entire 5’ ETS, the 18S sequence, and extends to the A3 cut  
374 site in ITS1 (see Figure 3 for a map). Figure 6B schematizes how A3 processing in the lichen  
375 fungus would yield the 23S-like intermediate containing intron-3, and how the presence of the  
376 intron would interfere with the ongoing assembly either by delaying it through splicing or by  
377 removing some of the intermediate by degradation (see Discussion). Figure 6C depicts for  
378 comparison the case of a self-splicing fungal rDNA intron which removes itself co-transcriptionally  
379 and quickly from nascent rRNA without significantly interfering with ribosome assembly.

380

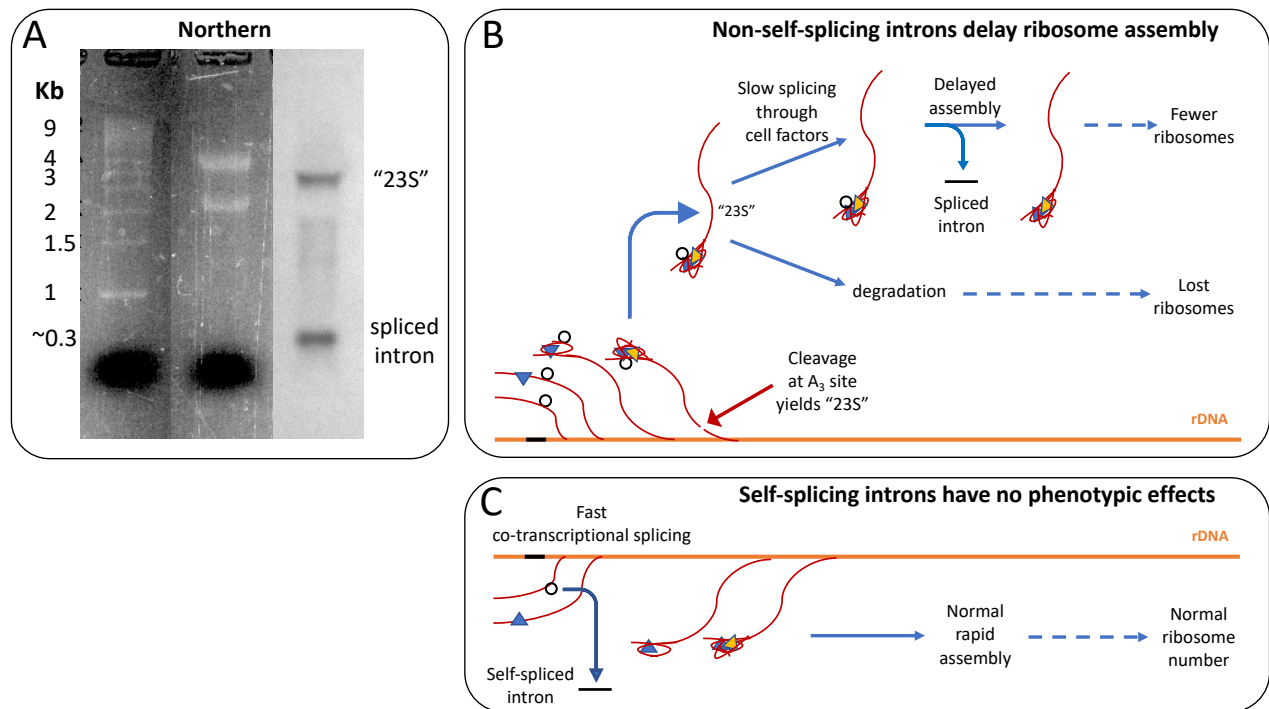

381  
 382  
 383 **Figure 6.** Northern blot and interpretation of the splicing pattern of a degenerate group I rDNA intron (intron-3) in the  
 384 *C. grayi* lichen fungus. **A.** composite image of the Northern. The first two lanes represent the SybrSafe-stained agarose  
 385 gel, with size standards in the first and total RNA in the second lane, with prominent 25S and 18S bands. The third lane  
 386 shows hybridization of the intron-3 probe to the RNA from the second lane transferred onto a membrane. **B.** Schematic  
 387 of the process by which the 23S-like intermediate is formed during transcription of rRNA (red curvy lines emanating  
 388 from the orange rDNA). The inserted intron is depicted either as a black segment on rDNA, or as an unspliced black  
 389 circle on rRNA. Colored triangles schematize proteins assembling with rRNA into pre-ribosomal particles (Fig. 3). **C.**  
 390 Schematic for comparison of the rapid cotranscriptional removal of a self-splicing intron from nascent rRNA.  
 391

### 392 **CRISPR is effective in introducing introns or base pair changes into all yeast rDNA repeats.**

393 Genetic manipulations of lichen fungi are in their infancy (WANG *et al.* 2020; LIU *et al.*  
 394 2021). Therefore, we tested the effects of lichen rDNA introns in the model fungus *S. cerevisiae*,  
 395 whose rDNA is normally intronless. We transformed yeast with a 57 base-pair spliceosomal intron  
 396 (first on left in Figure 1) from the rDNA of the lichen fungus *Cladonia grayi* (ARMALEO *et al.*  
 397 2019). The splicing signals overlap with those of yeast mRNA introns (Fig. 5) and thus are  
 398 expected to be recognized by yeast spliceosomes. CRISPR-Cas9 technology was seen as the only  
 399 available way to simultaneously insert the intron into 150 repeats of yeast rDNA (CHIOU AND  
 400 ARMALEO 2018; SANCHEZ *et al.* 2019) because of the powerful selection of CRISPR against  
 401 unmodified rDNA. Our method was developed to insert introns into the 18S and 25S rRNA genes  
 402 by Homology Directed Repair (HDR), but we list here for the record also the base pair substitutions  
 403 produced through Non-Homologous End Joining (NHEJ) during this work (Supplementary File 2).

404 Three intron-bearing mutants were constructed, with the intron stably inserted either in all  
 405 copies of the 18S (SSU) gene, of the 25S (LSU) gene, or of both. The selected yeast insertion sites  
 406 corresponded to two *C. grayi* intron sites and had appropriately located PAM sequences (Fig. 7).  
 407 Intron insertions were obtained by cotransformation of yeast with a Cas9-gRNA plasmid and the  
 408 corresponding intron containing fragment. Single intron insertion mutants MSS2 and MLS7 contain

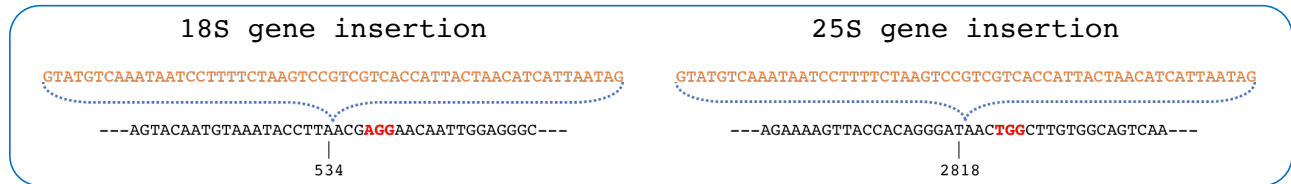

409  
 410 **Figure 7.** Intron insertion sites in the 18S and 25S rRNA genes of yeast. Only sense-strand sequences are shown, 5' ends  
 411 on the left. PAM sequences are marked red. The intron is colored orange and its insertion points by HDR are indicated  
 412 by the blue-dotted brackets. The vertical dash marks the nucleotide 5' to the Cas9 cut site on the rDNA sequence and the  
 413 numbers indicate the corresponding positions in the mature rRNA.

414 the intron in the 18S or 25S rRNA gene at positions 534 or 2818 respectively (Fig. 7) The double  
 415 insertion mutant Md contains the intron at those positions in both genes. All mutants were verified  
 416 by PCR (Fig. 8) and sequencing; additionally, correct splicing in MSS2 was confirmed by  
 417 sequencing the mature rRNA. Regardless of whether we inserted introns or produced base-pair  
 418 mutations around the Cas9 cut sites, the introduced changes appear to involve all repeats as  
 419

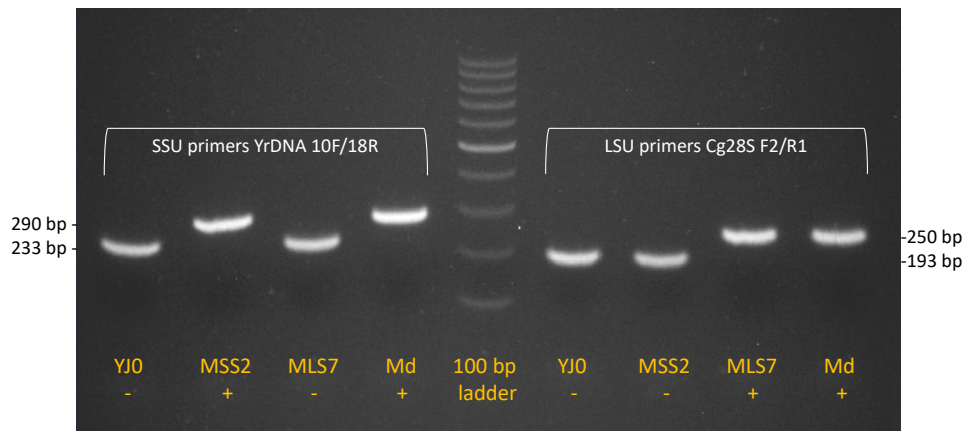

420  
 421 **Figure 8.** Agarose gel showing intron location in the yeast strains. Primer pairs (white lettering) flanking each intron  
 422 insertion site were used for PCR with the DNA from the four strains (orange lettering). For each primer pair, the sizes  
 423 (base pairs) of the fragments with or without the intron are indicated on the side. Intron absence/presence in each fragment  
 424 is labeled +/- . The sizes indicate that the wildtype strain YJ0 has no introns, MSS2 has the intron only in the SSU gene,  
 425 MLS7 has the intron only in the LSU gene, Md has the intron in both genes. The lanes with the intron fragments contain  
 426 no discernible trace of intronless fragments, suggesting that the introns spread through all rDNA repeats.

427 suggested by the absence of heterogeneous peaks at the mutation sites in the sequencing  
 428 chromatograms (Supplementary File 2) and by the absence of intronless bands in PCRs spanning  
 429 the intron insertions (Fig. 8). In addition, rDNA introns are stably inherited, which also suggests  
 430 that no intronless repeats were left to act as recombination seeds and restore the wildtype intronless  
 431 configuration. Spreading an intron to all yeast rDNA repeats was also achieved by Volker Vogt's  
 432 group (MUSCARELLA AND VOGT 1993; LIN AND VOGT 1998) with a method foreshadowing our use  
 433 of CRISPR-Cas9 to the same end: to study intron endonucleases, they introduced functional group I  
 434 rDNA introns from *Physarium polycephalum* or *Tetrahymena thermophila* into yeast rDNA.

435

### 436 **Small nucleolar RNAs may interfere with Cas9 when targeting rDNA**

437 Despite two attempts, CRISPR-mediated intron insertion into the rDNA of the YJ0 wildtype using  
 438 the large subunit guide sequence LS7 (matching the sense strand) failed. It was however successful

439 when we used the LS7nc guide sequence (matching the template strand at the same location). This  
 440 made us suspect that an endogenous yeast sequence serendipitously complementary to the LS7  
 441 guide RNA could have inhibited LS7-Cas9. A small nucleolar RNA (snoRNA) was considered a  
 442 likely culprit. During yeast rRNA synthesis and ribosome assembly, a number of specific ~100- to  
 443 1000-nucleotide long snoRNAs bind as ribonucleoprotein complexes to complementary sequences  
 444 on the rRNA, leading to post-synthetic nucleotide modifications in those sequences (DUPUIS-  
 445 SANDOVAL *et al.* 2015). A snoRNA (snR38) with an 11-base complementarity to the 3' terminal  
 446 region of the LS7 guide sequence (Fig. 9A) is in fact listed in the yeast snoRNA database  
 447 (<https://people.biochem.umass.edu/fournierlab/snornadb/main.php>). Although we do not  
 448 demonstrate this directly here, the likelihood that snR38 inhibited Cas9 by binding to LS7 is  
 449 supported a) by the fact that the complementarity is in the snoRNA region that is meant to bind  
 450 directly to rRNA to methylate it, b) by the successful insertion of the intron at the same position  
 451 when using the LS7nc guide which is not complementary to snR38 (Fig. 9A and B), and c) by the  
 452 absence of a snoRNA complementary to the SS2 guide sequence which mediated the successful  
 453 insertion of the intron into the SS2 site. Figure 9B also shows that the exact insertion point is  
 454 determined by the placement of the intron within the cotransforming PCR fragment, even if it is a  
 455 few bases removed from the actual Cas9 cut site.  
 456

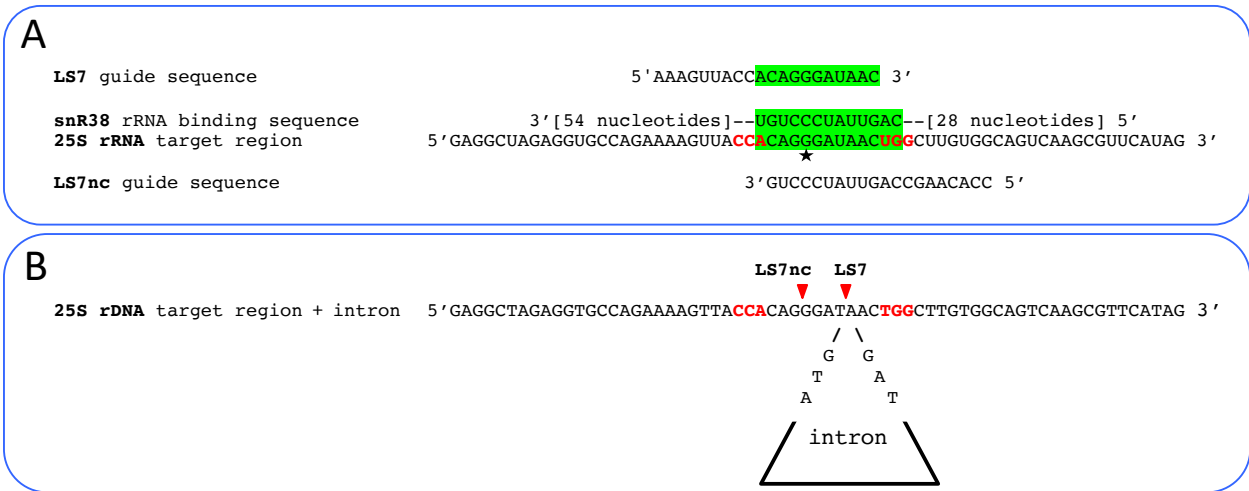

457  
 458 **Figure 9.** Cause of the likely inhibition of Cas9 by snR38, and intron targeting to the LSU gene. **A.** Complementary  
 459 binding between the RNA-binding region of snR38 and the LS7 guide RNA is likely to have inhibited the Cas9-LS7  
 460 complex. RNA complementary regions are highlighted green; nucleotides corresponding to a PAM sequence on either  
 461 strand are in red; the star marks rRNA nucleotide 2815, targeted for O-methylation by snR38; Cas9 was not inhibited  
 462 when used with guide RNA LS7nc, which could not bind to snR38. **B.** The intron was inserted at the LS7 site using LS7nc  
 463 guide RNA. Red arrowheads indicate the Cas9 cut sites (at positions 2814 for LS7nc and 2818 for LS7) corresponding to  
 464 the two opposite-strand PAM sites (in red). While LS7nc directed Cas9 to cut the site on the left, homology directed  
 465 repair integrated the intron in the rDNA in correspondence of the LS7 site at position 2818, where the intron was located  
 466 in the PCR fragment used in cotransformation.  
 467

### 468 Introns decrease rDNA copy number, inhibit growth, and modify cell morphology

469 To assess whether intron presence affects rDNA copy number, we used the  $\Delta\Delta$ Ct qPCR method by  
 470 (PFAFFL 2001) to determine the relative number of rDNA copies in mutants vs. wildtype. Copy  
 471 numbers in each of the single-intron mutants MSS2 and MLS7 decreased to about 53% of the YJ0  
 472 wildtype (Supplementary File 1). The qPCR data from the double-intron mutant Md were  
 473 uninterpretable for unclear reasons. The intron-bearing mutants produced small, slow-growing

474 colonies and their growth rates in liquid culture were 4-6 times slower than that of YJ0 (Fig. 10). It  
 475 is noteworthy that the single insertion in the LSU region caused a much stronger growth inhibition  
 476 than the one in the SSU region, pointing to the importance of intron context. The slowdown appears  
 477 to lengthen the cell cycle in G1, as the strains' budding frequency is lowered from 65.6% in the  
 478 wildtype YJ0 to 27.4% (MSS2), 43% (MLS7), and 39.7% (Md). On average, cells of the intron-  
 479 bearing strains are larger than those of the wildtype. The cell morphology of MLS7 and Md is also  
 480 frequently abnormal (Fig. 11) and may have inflated the bud counts in these strains.  
 481

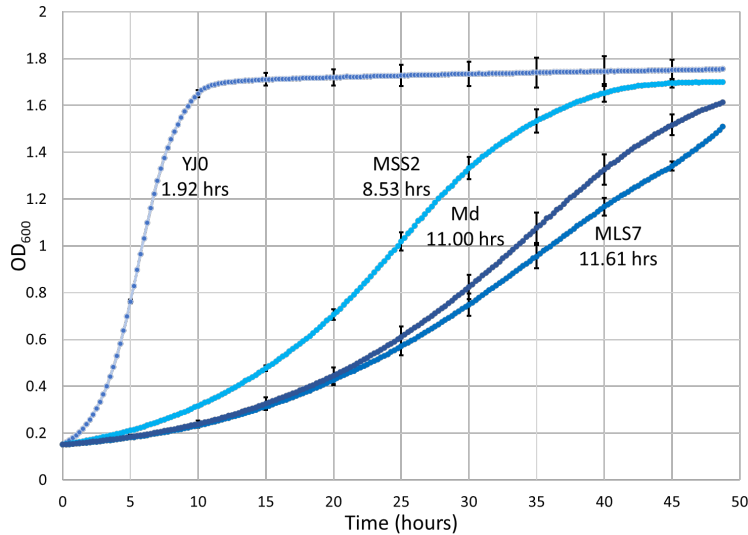

482  
 483 **Figure 10.** Growth curves for the four strains. Curves represent the means of three biological replicates and four technical  
 484 replicates for each strain. Bars represent the SD. The numbers next to the curves are the doubling times for each strain.  
 485  
 486

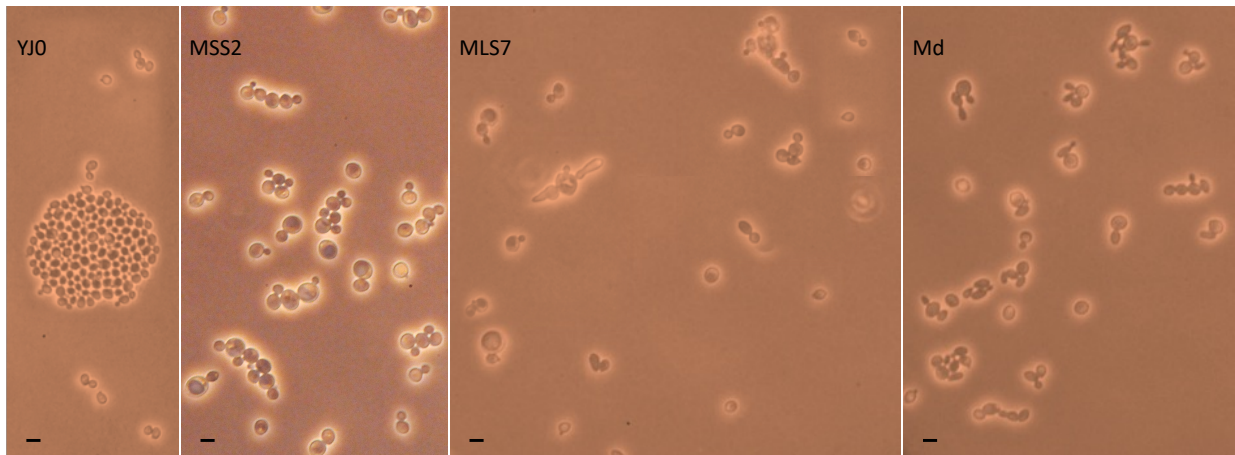

487  
 488 **Figure 11.** Cell size and morphology. Cells were photographed growing on the surface of freshly seeded agar plates. Bar  
 489 = 10 $\mu$ . Intron-bearing cells are on average larger than the YJ0 wildtype cells. Several MLS7 and Md cells have aberrant  
 490 morphologies. Due to its faster growth, YJ0 quickly forms many incipient colonies, one of which is visible here.  
 491

### 492 **Introns enhance desiccation tolerance in *S. cerevisiae***

493 We measured desiccation tolerance in the wildtype and the three intron-bearing mutants using a  
 494 method modified from (WELCH AND KOSHLAND 2013). Each strain was grown to mid-log phase,  
 495 two identical samples were removed, and one was subjected to desiccation while serial dilutions of  
 496 the other were plated. One day later the desiccated sample was resuspended and serial dilutions

497 were plated. Desiccation tolerance (Fig. 12) for each strain is expressed as the ratio of live cells  
 498 (scored as colonies) in desiccated vs. undessicated samples of that strain. Figure 12A shows the  
 499 resistance of individual biological replicates. Three biological replicates were assayed for YJ0 and  
 500 Md, and five and six biological replicates were assayed for MSS2 and MLS7, respectively. The  
 501 variation between replicates might be due to small between-sample differences in drying speed  
 502 and/or to the stochastic behavior of the biochemical networks underlying stress tolerance (see  
 503 Discussion). Figure 12B shows the same data plotted as averages of the biological replicates. For  
 504 YJ0, the average absolute survival was  $1.5 \times 10^{-5}$ . The average absolute (and relative) survival  
 505 ratios for MSS2, MLS7, and Md were  $6.3 \times 10^{-4}$  (42),  $4.5 \times 10^{-3}$  (300), and  $2.6 \times 10^{-2}$  (1700). The  
 506 position and number of introns affects desiccation resistance, paralleling their effect on growth (Fig.  
 507 10). MLS7 with the intron in the large subunit is more desiccation resistant than MSS2 with the  
 508 intron in the small subunit. Md, the strain with introns in both subunits, is the most resistant.  
 509

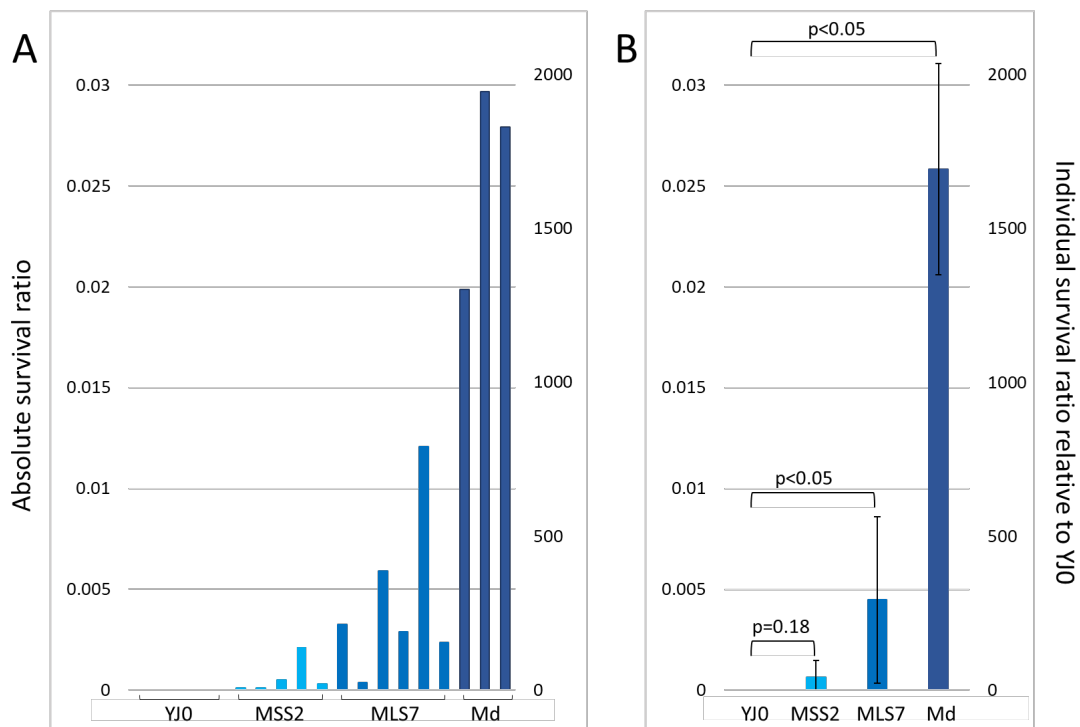

510  
 511 **Figure 12.** Desiccation resistance of the four strains. The Y axes are the same in both panels. Absolute survival ratios  
 512 represent the fraction of cells surviving desiccation within each strain. Relative survival ratios represent each strain's  
 513 resistance relative to that of the YJ0 wildtype. **A.** Resistances of individual biological replicates. **B.** Same data averaged  
 514 over biological replicates; SD in black; brackets indicate p values for mutant vs. wildtype ratios.  
 515

516  
 517 **Introns induce trehalose biosynthesis in the double mutant**

518 In some organisms, including yeast, intracellular concentrations of the disaccharide  
 519 trehalose are positively correlated with desiccation tolerance (KOSHLAND AND TAPIA 2019). We  
 520 therefore measured whether intracellular trehalose accumulates in our mutants during normal  
 521 growth. The procedure involves extraction of trehalose from a fixed number of mid-log phase cells  
 522 grown in YEPD medium, trehalase treatment to split trehalose into its two glucose constituents, and  
 523 a colorimetric assay that measures glucose concentration. The results (Fig. 13) indicate that  
 524 trehalose was undetectable not only in the YJ0 wildtype, but also in the single-intron mutants MSS2  
 525 and MLS7, despite their increased desiccation tolerances. Trehalose increased to detectable levels

526 only in the Md strain. Md carries two introns, one per subunit in each rDNA gene copy, and  
527 displays the highest desiccation tolerance (Fig. 12).

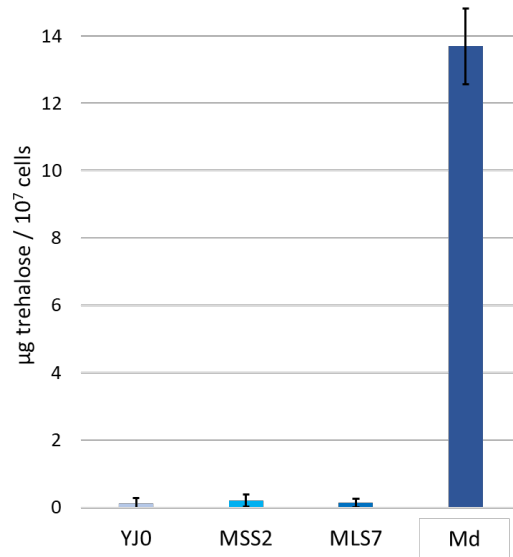

528  
529 **Figure 13.** Intracellular trehalose in the four strains. Amounts are expressed /10<sup>7</sup> cells /ml of assay. For each strain, the  
530 SD is calculated on 9 samples (three biological replicates, each with three technical replicates).  
531

532  
533 **Discussion**  
534

535 The successful use of CRISPR to mutagenize the entire array of rDNA repeats in yeast has  
536 been described and discussed (CHIOU AND ARMALEO 2018; SANCHEZ *et al.* 2019). The interesting,  
537 albeit peripheral issue of snoRNA interference with Cas9 described in Results is not further  
538 discussed here. In our first experiment, we used the *C. grayi* lichen fungus to assess, using a  
539 Northern blot, the splicing pattern of a degenerate group I intron naturally present in its rDNA. All  
540 other experiments were done by approximating a lichen-like nuclear rDNA intron arrangement in  
541 yeast. Using CRISPR, a lichen spliceosomal intron was introduced at one or two positions into each  
542 yeast rDNA repeat (Figs. 7 and 8). We could not have used a lichen degenerate group I intron, as  
543 yeast does not have the machinery to splice it out. Bending the general rule that spliceosomes  
544 operate only on Polymerase II transcripts, yeast successfully removed the lichen spliceosomal  
545 introns from the Polymerase I rRNA transcripts, allowing us to model in yeast the effects of lichen  
546 rDNA introns. The goal was to test in yeast whether the inability of lichen rDNA introns to self-  
547 splice may lead to slow growth and desiccation tolerance.  
548

549 **In the lichen mycobiont, delayed group I intron splicing is likely to slow ribosome assembly**

550 The ~300-base size of the smaller band in the Northern blot (Fig. 6A) and the absence of a  
551 signal from the mature 18S rRNA indicate that the degenerate group I intron-3 in the rRNA of the  
552 *C. grayi* mycobiont is correctly spliced out as a complete ~300-nucleotide fragment. However, the  
553 ~ 3 Kb size of the larger band indicates that the splicing is delayed enough for the intron to persist  
554 within an accumulating precursor of the 18S rRNA. The size of this intron-bearing precursor is  
555 slightly larger than that of a 2.8-Kb yeast rRNA intermediate (23S) observed when yeast grows  
556 slowly due to mutational or nutritional stress (VENEMA AND TOLLERVEY 1999; TALKISH *et al.* 2016;  
557 KLINGE AND WOOLFORD 2019) and is an indication that under those circumstances rRNA



558 processing is delayed until after transcription of the entire 35S gene product is terminated (TALKISH  
559 *et al.* 2016). The yeast 23S precursor contains a fully unprocessed 5' ETS, the 18S sequence, and  
560 ends at the A<sub>3</sub> processing site in ITS1 (see Fig. 3 for a map). The 23S precursor is part of the SSU  
561 processome and its 5'ETS region needs to be rapidly removed for ribosome assembly to continue  
562 (KLINGE AND WOOLFORD 2019). Therefore, accumulation of an unprocessed intron-bearing 23S-  
563 like precursor in the mycobiont supports our hypothesis that intron presence delays ribosome  
564 assembly in lichens (Fig. 6B). The Northern shows also that the precursor is partly degraded (Fig.  
565 6A). The 23S rRNA precursor accumulating in yeast under slow-growth conditions is frequently  
566 degraded and associated with decreased levels of mature 18S rRNA, *i.e.* with ribosome depletion  
567 (VENEMA AND TOLLERVEY 1999; TALKISH *et al.* 2016). Degradation of stalled rRNA processing  
568 intermediates in yeast due to an rDNA intron defective in self-splicing has also been reported for  
569 the large subunit by (JACKSON *et al.* 2006). The processing pattern in fast-growing yeast (conserved  
570 in other fast-growing fungi) is quite different, as most processing of the 18S rRNA precursor region  
571 occurs through rapid co-transcriptional removal of the entire 5'ETS and most of ITS1 (FERNÁNDEZ-  
572 PEVIDA *et al.* 2015; KLINGE AND WOOLFORD 2019), with no accumulation of 23S rRNA (Fig. 6C).  
573 In conclusion, accumulation of an intron-3 bearing 23S-like intermediate and its partial degradation  
574 in the *C. grayi* fungus strongly imply that intron-3 and most other lichen rDNA introns delay  
575 ribosome assembly and reduce ribosome number.

576

### 577 **The slow growth of the yeast mutants suggests that non-self-splicing rDNA introns inhibit** 578 **ribosome biogenesis constitutively**

579 The large growth decreases in the intron-bearing yeast mutants (Fig. 10) also support our  
580 main hypothesis that interference by spliceosomes with the highly cooperative and perturbation  
581 sensitive ribosome assembly (OSHEIM *et al.* 2004) delays rRNA processing and slows growth. The  
582 growth decreases depend on position and number of introns, but not in a linear fashion (Fig. 10).  
583 The structures of rRNA folding intermediates (KLINGE AND WOOLFORD 2019), indicate that the 18S  
584 gene intron insertion site is located at the surface of the SSU processome, whereas the 25S insertion  
585 site is buried deep in the folding LSU pre-ribosomal particle, near the developing entrance to the  
586 polypeptide exit tunnel. The interference of intron splicing with LSU assembly might therefore be  
587 stronger than with SSU assembly, suggesting an explanation for the growth differential between the  
588 two single insertions and also for the similar growth rates of the double insertion and the single 25S  
589 rRNA insertion. The growth defects are permanent, as expected for a process co-occurring with  
590 rRNA transcription. Also, other phenotypes we observe in the mutants, like rDNA repeat number  
591 reduction, G1 delays, and aberrant cell morphologies (Fig. 11), are likely consequences of intron  
592 interference with ribosomal assembly. These phenotypes could all result from DNA replication  
593 stress (TRIPATHI *et al.* 2011; SALIM *et al.* 2017) perhaps triggered by the interference of intron  
594 splicing with the functions of early 60S assembly factors Noc3p and Rix, which are also part of the  
595 DNA pre-replicative complex (ZHANG *et al.* 2002; DEZ AND TOLLERVEY 2004; HUO *et al.* 2012).

596 Besides interfering with rRNA processing through their splicing machinery, rRNA  
597 spliceosomal introns may also inhibit growth by competing with their mRNA counterparts for  
598 limiting spliceosomal components, directly inhibiting splicing of ribosomal protein (RP) mRNAs  
599 and RP synthesis. Competition between the highly expressed intron-rich RP genes, which use the  
600 most splicing factors (ARES *et al.* 1999), and other intron-containing genes has been demonstrated  
601 in yeast (MUNDING *et al.* 2013). Even with a reduced number of rDNA genes (70 to 80), the single  
602 intron mutants would have roughly 25% more spliceosomal introns in their genome than the

603 wildtype strain. The inhibition of RP synthesis might be deepened if these introns persist as  
604 undegraded and linearized RNAs after splicing (MORGAN *et al.* 2019; PARENTEAU *et al.* 2019).

605

### 606 **Induction of desiccation tolerance is stochastic and independent of the onset of desiccation**

607 In yeast, ribosomal synthesis during unstressed growth is enabled by the activity of the TOR  
608 and PKA signal transduction pathways. Environmental stress signals repress TOR/PKA, which  
609 regulate the two arms of the Environmental Stress Response (ESR) (GASCH *et al.* 2000). One arm  
610 involves ~600 genes which are turned down under stress and include ribosomal biogenesis (RiBi)  
611 genes needed for rRNA, RP, and assembly factor production. The other involves ~300 genes which  
612 are upregulated by stress and are responsible for specific induced defenses (iESR) like the  
613 disaccharide trehalose, chaperone proteins and redox effectors.

614 Extreme desiccation stress quickly deprives cells of water, the most basic ingredient for any  
615 life-sustaining process. This makes it critical for desiccation-defenses to be in place before the onset  
616 of desiccation. Most cells in an unstressed yeast population will not express the ESR and will die  
617 when desiccated. However, due to cell-to-cell stochasticity of transcriptional, translational and post-  
618 translational network regulation (GASCH *et al.* 2017), a few cells will express the ESR during  
619 unstressed growth in liquid media and survive desiccation. This “bet-hedging” (LEVY *et al.* 2012)  
620 allows a single-celled, fast-growing organism like yeast to thrive evolutionarily, as variable subsets  
621 of the population survive under changing stresses, even if most of the population dies. The average  
622 desiccation survival of normal intronless *S. cerevisiae* growing in rich liquid media is  $\sim 10^{-6}$ . That  
623 means that in the bet-hedging process only one in a million cells has serendipitously activated,  
624 before desiccation, the ESR defenses needed to survive. In other yeast experiments that uncovered  
625 processes or molecules protecting cells from desiccation damage (GADD *et al.* 1987; CALAHAN *et al.*  
626 *et al.* 2011; WELCH *et al.* 2013; TAPIA *et al.* 2015; KIM *et al.* 2018), desiccation tolerance could be  
627 experimentally increased up to  $10^6$  fold relative to normal “unprepared” yeast as increasingly larger  
628 fractions of cells expressed their defenses before desiccation was applied.

629 The intron-bearing mutants are 40 to 1700 times more resistant to desiccation than the  
630 wildtype strain, depending on intron position and number (Fig. 12). The highest resistance  
631 corresponds to only 2.6% of cells surviving desiccation, with bet-hedging still occurring, although  
632 resistance is spread to many more cells than in the YJ0 wildtype. Our desiccation results parallel  
633 those by (WELCH *et al.* 2013), who inhibited ribosomal biogenesis through the TOR pathway in two  
634 specific ways, by treating yeast with rapamycin or by deleting the TOR effector SFP1 which is a  
635 positive regulator of ribosomal protein and assembly genes. Either method increased desiccation  
636 resistance. In addition, they tested 41 temperature sensitive (Ts) ribosome assembly protein mutants  
637 which, like our intron mutants, impaired ribosome assembly independently of TOR/PKA. Also like  
638 ours, the Ts mutations were expressed in liquid media before desiccation, and all produced various  
639 degrees of desiccation resistance, the highest matching the 2-3% resistance of our double mutant.

640

### 641 **Ribosome number reduction and trehalose increases represent two complementary defenses 642 against desiccation, the first constitutive and the second inducible**

643 While the slow growth of the yeast mutants is likely a direct, even if not linear, consequence  
644 of intron-mediated RiBi repression, the connection between the latter and increased desiccation  
645 tolerance is less clear. However, viewing the trehalose results within the context of rDNA introns  
646 sheds some light on the issue. The disaccharide trehalose is a primary anti-desiccation molecule in  
647 several anhydrobiotes (KOSHLAND AND TAPIA 2019). In yeast it is induced through the iESR with  
648 several other defenses and reduces protein misfolding and aggregation *in vitro* and *in vivo* (KIM *et*

649 al. 2018). Trehalose was assayed in the intron-bearing mutants as they grew slowly in rich liquid  
650 media in absence of environmental stress.

651 Intracellular trehalose concentration, naturally or experimentally induced, is generally  
652 proportional to desiccation resistance in intronless yeast (GADD *et al.* 1987; TAPIA AND KOSHLAND  
653 2014). In our strains, despite their increased desiccation tolerances, trehalose remained undetectable  
654 in both single-intron mutants, and was detected only in the double-intron mutant Md at 14  $\mu\text{g/ml}$   
655 (Fig. 13). This concentration would be too low in normal, intronless yeast to account for the 2.6%  
656 desiccation tolerance shown by Md (Fig. 12). Yeast tolerances around 1% require trehalose  
657 concentrations between 150  $\mu\text{g/ml}$  (Fig 2 in (TAPIA *et al.* 2015)) and 700  $\mu\text{g/ml}$  (Fig 2 in (TAPIA  
658 AND KOSHLAND 2014)), depending on the experiment. Our trehalose results resemble findings by  
659 (CALAHAN *et al.* 2011) who showed that desiccation resistance remained high in slow-growing  
660 yeast after diauxic shift even without trehalose (eliminated through pathway mutations).

661 This indicates that, whether yeast grows slowly because of rDNA introns or because of  
662 depletion of fermentable carbon sources, factors other than inducible defenses like trehalose can  
663 elicit desiccation tolerance. We believe that data in the literature strongly suggest that a central  
664 component of those “other factors” is the constitutive reduction of cytoplasmic ribosome number.  
665 (WELCH *et al.* 2013) showed that TOR dependent and independent inhibition of ribosome function  
666 increases desiccation tolerance; (PESTOV AND SHCHERBIK 2012) showed through rRNA quantitation  
667 that rapamycin inhibition of TOR during yeast exponential growth degrades ~50% of ribosomes;  
668 (DELARUE *et al.* 2018) demonstrated directly that inhibition of the TOR pathway by rapamycin  
669 increases cytoplasmic diffusion rates by decreasing ribosome numbers by 40-50%. They also  
670 showed that diffusion rates increase without rapamycin while yeast cells enter stationary phase,  
671 again indicating a decrease in ribosome number during this transition, shown by (CALAHAN *et al.*  
672 2011) to produce large increases in desiccation tolerance. Ribosome depletion during entry into  
673 stationary phase was also observed directly at the rRNA level by (TALKISH *et al.* 2016). We  
674 therefore hypothesize that permanent RiBi repression by rDNA introns produces desiccation  
675 tolerance by maintaining a less crowded cytoplasm with fewer ribosomes and proteins. This would  
676 reduce protein aggregation, misfolding, and phase separation (DELARUE *et al.* 2018), and therefore  
677 the load on heat shock proteins and damage to the proteome upon water loss and cell volume  
678 shrinkage. Synergy between this constitutive ribosome-based defense and inducible defenses like  
679 trehalose, Hsp12 (KIM *et al.* 2018), glycerol and polyols (DUPONT *et al.* 2014) might allow lower  
680 concentrations of inducible defenses to yield the same protective effects that higher concentrations  
681 yield in a normally more crowded cytoplasm. In our yeast mutants, both types of defenses were  
682 limited by bet hedging, thus protecting only a subset of cells. Stochastic cell-to-cell variation in  
683 ribosome numbers and induced defenses, differentiating desiccation survival between individual  
684 cells, is not in contradiction with the constitutive expression of ribosomal introns slowing overall  
685 growth of the mutant cell population, which is averaged through time and across all cells.

686

### 687 **Extrapolations on the functions and evolution of rDNA introns in lichens**

688 Unlike the fast-growing, single-celled yeast, lichens are slow-growing, differentiated  
689 multicellular networks of hyphae interwoven with consortia of different organisms. Their  
690 adaptation to extreme and repeated moisture oscillations must ensure survival of all or most  
691 component cells, not just of small subsets as is the case with bet hedging in yeast. We view the  
692 acquisition of large numbers of non-self-splicing rDNA introns as a powerful constitutive defense  
693 suppressing bet hedging across the entire lichen thallus. Such a constitutive defense based on  
694 ribosome reduction might also reduce the amounts of inducible defenses needed, like trehalose,

695 polyols, and Hsps. As the introduction of just two non-self-splicing rDNA introns is quite disruptive  
696 to yeast, we imagine that the evolutionary insertion of many introns into mycobiont rDNA was  
697 gradual, providing time for selection to turn partial disruptions of RiBi and DNA replication into  
698 adaptations. The importance of constitutive stress-defenses in lichens has been also recognized by  
699 (GASULLA *et al.* 2021).

700 How could the degeneracy of lichen Group I introns have evolved? Despite lacking  
701 sequences needed for self-splicing, lichen group I introns appear still able to fold into tertiary  
702 structures resembling the original ones (DEPRIEST AND BEEN 1992; BHATTACHARYA *et al.* 2000;  
703 BHATTACHARYA *et al.* 2002; HAUGEN *et al.* 2004b). It is therefore possible that, while progressively  
704 removing catalytically important sections from the introns, natural selection transferred splicing  
705 capability to the maturases that originally helped those structures fold. Cloning lichen maturases  
706 could verify such a scenario. Why are group I and spliceosomal introns maintained together in  
707 lichen rDNA? We think because their primary functions are different: the numerous group I introns  
708 primarily interfere with rRNA processing, whereas the spliceosomal introns' direct interference  
709 with rRNA processing is secondary in lichens due to their relatively small numbers; their primary  
710 function is to repress ribosomal protein (RP) synthesis by competing for limiting splicing factors  
711 with the intron-rich RP mRNAs.

712 In conclusion, the splicing pattern of a degenerate group I intron in a lichen fungus implies  
713 that lichen rDNA introns inhibit ribosome assembly. With yeast, we demonstrate that introduction  
714 into its rDNA of a lichen intron requiring spliceosomes for removal strongly enhances desiccation  
715 tolerance, also through the likely inhibition of ribosome assembly. We hypothesize that the  
716 numerous rDNA introns present in lichen fungi protect the entire mycelium in the thallus essentially  
717 by lowering ribosome content and holding the cytoplasm in a permanent state of “molecular  
718 frugality” which is less susceptible to desiccation damage. The evolution in lichens of a specific  
719 splicing machinery for the degenerate group I introns turned them into repressors of rRNA  
720 processing and ribosome assembly, transforming genetic parasites into a new tool against  
721 environmental stress; the ectopic rDNA location of spliceosomal introns turned them into repressors  
722 of ribosomal protein synthesis to the same end. We think that evolutionarily, the spreading of  
723 special introns into the rDNA of lichen fungi was a watershed moment that helped lichens adapt to  
724 their permanent exposure to ever-changing environments. The price they paid was slow growth.

725

## 726 **Acknowledgments**

727

728 We thank John Mercer for useful discussions; Vivian Miao, Paul Manos, John Woolford,  
729 Austen Ganley for commenting on the manuscript; Susan May for assistance with the Northern.  
730 Duke University Undergraduate Research Support for funding L.C.; Duke University Trinity  
731 College of Arts and Sciences for teaching lab funds for D.A.; 73 people, through experiment.com,  
732 for research support for D.A. and L.C. The authors have no competing financial interests.

733

## 734 **References**

735

736 Ares, M., L. Grate and M. H. Pauling, 1999 A handful of intron-containing genes produces the lion's share of  
737 yeast mRNA. *RNA* 5: 1138-1139.

738 Armaleo, D., and S. May, 2009 Sizing the fungal and algal genomes of the lichen *Cladonia grayi* through  
739 quantitative PCR. *Symbiosis* 49: 43-51.

740 Armaleo, D., O. Muller, F. Lutzoni, O. S. Andresson, G. Blanc *et al.*, 2019 The lichen symbiosis re-viewed  
741 through the genomes of *Cladonia grayi* and its algal partner *Asterochloris glomerata*. *BMC*  
742 *Genomics* 20.

743 Bhattacharya, D., T. Friedl and G. Helms, 2002 Vertical evolution and intragenic spread of lichen-fungal  
744 group I introns. *Journal of Molecular Evolution* 55: 74-84.

745 Bhattacharya, D., F. Lutzoni, V. Reeb, D. Simon, J. Nason *et al.*, 2000 Widespread occurrence of  
746 spliceosomal introns in the rDNA genes of ascomycetes. *Molecular Biology and Evolution* 17: 1971-  
747 1984.

748 Brehm, S. L., and T. R. Cech, 1983 The fate of an intervening sequence RNA: Excision and cyclization of the  
749 *Tetrahymena* ribosomal RNA intervening sequence in vivo. *Biochemistry* 22: 2390-2397.

750 Calahan, D., M. Dunham, C. DeSevo and D. E. Koshland, 2011 Genetic Analysis of Desiccation Tolerance in  
751 *Saccharomyces cerevisiae*. *Genetics* 189: 507-519.

752 Candotto Carniel, F., B. Fernandez-Marín, E. Arc, T. Craighero, J. M. Laza *et al.*, 2020 How dry is dry?  
753 Molecular mobility in relation to thallus water content in a lichen. *Journal of Experimental Botany*:  
754 1576–1588.

755 Cech, T. R., 1990 Self-Splicing of Group-I Introns. *Annual Review of Biochemistry* 59: 543-568.

756 Chiou, L., and D. Armaleo, 2018 A method for simultaneous targeted mutagenesis of all nuclear rDNA  
757 repeats in *Saccharomyces cerevisiae* using CRISPR-Cas9. *bioRxiv*: 276220.

758 Delarue, M., G. P. Brittingham, S. Pfeffer, I. V. Surovtsev, S. Pinglay *et al.*, 2018 mTORC1 Controls Phase  
759 Separation and the Biophysical Properties of the Cytoplasm by Tuning Crowding. *Cell* 174: 338-349.

760 DePriest, P. T., 1993 Small-Subunit rDNA Variation in a Population of Lichen Fungi Due to Optional Group-I  
761 Introns. *Gene* 134: 67-74.

762 DePriest, P. T., and M. D. Been, 1992 Numerous group I introns with variable distributions in the ribosomal  
763 DNA of a lichen fungus. *Journal of Molecular Biology* 228: 315-321.

764 Dez, C., and D. Tollervey, 2004 Ribosome synthesis meets the cell cycle. *Curr Opin Microbiol* 7: 631-637.

765 Dupont, S., A. Rapoport, P. Gervais and L. Beney, 2014 Survival kit of *Saccharomyces cerevisiae* for  
766 anhydrobiosis. *Applied Microbiology and Biotechnology* 98: 8821-8834.

767 Dupuis-Sandoval, F., M. Poirier and M. S. Scott, 2015 The emerging landscape of small nucleolar RNAs in  
768 cell biology. *Wiley Interdisciplinary Reviews-RNA* 6: 381-397.

769 Fernández-Pevida, A., D. Kressler and J. de la Cruz, 2015 Processing of preribosomal RNA in *Saccharomyces*  
770 *cerevisiae*. *WIREs RNA* 6: 191-209.

771 Gadd, G. M., K. Chalmers and R. H. Reed, 1987 The role of trehalose in dehydration resistance of  
772 *Saccharomyces cerevisiae*. *FEMS Microbiology Letters* 48: 249-254.

773 Gargas, A., P. T. DePriest and J. W. Taylor, 1995 Positions of multiple insertions in SSU rDNA of lichen-  
774 forming fungi. *Molecular Biology and Evolution* 12: 208-218.

775 Gasch, A. P., P. T. Spellman, C. M. Kao, O. Carmel-Harel, M. B. Eisen *et al.*, 2000 Genomic Expression  
776 Programs in the Response of Yeast Cells to Environmental Changes. *Molecular Biology of the Cell*  
777 11: 4241-4257.

778 Gasch, A. P., F. B. Yu, J. Hose, L. E. Escalante, M. Place *et al.*, 2017 Single-cell RNA sequencing reveals  
779 intrinsic and extrinsic regulatory heterogeneity in yeast responding to stress. *Plos Biology* 15.

780 Gasulla, F., E. M. del Campo, L. M. Casano and A. Guéra, 2021 Advances in Understanding of Desiccation  
781 Tolerance of Lichens and Lichen-Forming Algae. *Plants* 10: 807.

782 Gibney, P. A., A. Schieler, J. C. Chen, J. D. Rabinowitz and D. Botstein, 2015 Characterizing the in vivo role of  
783 trehalose in *Saccharomyces cerevisiae* using the AGT1 transporter. *Proceedings of the National*  
784 *Academy of Sciences of the United States of America* 112: 6116-6121.

785 Hamada, N., 1996 Induction of the Production of Lichen Substances by Non-Metabolites. *The Bryologist* 99:  
786 68-70.

787 Haugen, P., V. Reeb, F. Lutzoni and D. Bhattacharya, 2004a The evolution of homing endonuclease genes  
788 and group I introns in nuclear rDNA. *Molecular Biology and Evolution* 21: 129-140.

789 Haugen, P., H. J. Runge and D. Bhattacharya, 2004b Long-term evolution of the S788 fungal nuclear small  
790 subunit rRNA group I introns. *RNA* 10: 1084-1096.

791 Hedberg, A., and S. D. Johansen, 2013 Nuclear group I introns in self-splicing and beyond. *Mobile DNA* 4.

792 Hemsley, A., N. Arnheim, M. D. Toney, G. Cortopassi and D. J. Galas, 1989 A Simple Method for Site-  
793 Directed Mutagenesis Using the Polymerase Chain-Reaction. *Nucleic Acids Research* 17: 6545-6551.

794 Hoffman, C. S., and F. Winston, 1987 A ten-minute DNA preparation from yeast efficiently releases  
795 autonomous plasmids for transformation of *Escherichia coli*. *Gene* 57: 267-272.

796 Honegger, R., 2012 The Symbiotic Phenotype of Lichen-Forming Ascomycetes and Their Endo- and  
797 Epibionts in *Fungal Associations. The Mycota (A Comprehensive Treatise on Fungi as Experimental*  
798 *Systems for Basic and Applied Research)* edited by B. Hock. Springer, Berlin, Heidelberg.

799 Huo, L., R. Wu, Z. Yu, Y. Zhai, X. Yang *et al.*, 2012 The Rix1 (Ipi1p-2p-3p) complex is a critical determinant of  
800 DNA replication licensing independent of their roles in ribosome biogenesis. *Cell Cycle* 11: 1325-  
801 1339.

802 Jackson, S. A., S. Koduvayur and S. A. Woodson, 2006 Self-splicing of a group I intron reveals partitioning of  
803 native and misfolded RNA populations in yeast. *RNA* 12: 2149-2159.

804 Junttila, S., A. Laiho, A. Gyenesei and S. Rudd, 2013 Whole transcriptome characterization of the effects of  
805 dehydration and rehydration on *Cladonia rangiferina*, the grey reindeer lichen. *BMC Genomics* 14.

806 Kim, S. X., G. Camdere, X. C. Hu, D. Koshland and H. Tapia, 2018 Synergy between the small intrinsically  
807 disordered protein Hsp12 and trehalose sustain viability after severe desiccation. *Elife* 7.

808 Klinge, S., and J. L. Woolford, 2019 Ribosome assembly coming into focus. *Nature Reviews Molecular Cell*  
809 *Biology* 20: 116-131.

810 Koshland, D., and H. Tapia, 2019 Desiccation tolerance: an unusual window into stress biology. *Molecular*  
811 *Biology of the Cell* 30: 737-741.

812 Kranner, I., R. Beckett, A. Hochman and T. H. Nash, 2008 Desiccation-tolerance in lichens: a review.  
813 *Bryologist* 111: 576-593.

814 Kupfer, D. M., S. D. Drabenstot, K. L. Buchanan, H. S. Lai, H. Zhu *et al.*, 2004 Introns and splicing elements of  
815 five diverse fungi. *Eukaryotic Cell* 3: 1088-1100.

816 Lambowitz, A., M. Caprara, S. Zimmerly and P. Perlman, 1999 18 Group I and Group II Ribozymes as RNPs:  
817 Clues to the Past and Guides to the Future. *Cold Spring Harbor Monograph Archive* 37: 451-485.

818 Leprince, O., and J. Buitink, 2015 Introduction to desiccation biology: from old borders to new frontiers.  
819 *Planta* 242: 369-378.

820 Levy, S. F., N. Ziv and M. L. Siegal, 2012 Bet Hedging in Yeast by Heterogeneous, Age-Correlated Expression  
821 of a Stress Protectant. *Plos Biology* 10.

822 Lin, J., and V. M. Vogt, 1998 I-PpoI, the endonuclease encoded by the group I intron PpLSU3, is expressed  
823 from an RNA polymerase I transcript. *Molecular and Cellular Biology* 18: 5809-5817.

824 Liu, R., W. Kim, J. A. Paguirigan, M.-H. Jeong and J.-S. Hur, 2021 Establishment of *Agrobacterium*  
825 *tumefaciens*-Mediated Transformation of *Cladonia macilenta*, a Model Lichen-Forming Fungus.  
826 *Journal of Fungi* 7: 252.

827 Morgan, J. T., G. R. Fink and D. P. Bartel, 2019 Excised linear introns regulate growth in yeast. *Nature* 565:  
828 606-611.

829 Munding, E. M., L. Shiue, S. Katzman, J. P. Donohue and M. Ares, 2013 Competition between Pre-mRNAs  
830 for the Splicing Machinery Drives Global Regulation of Splicing. *Molecular Cell* 51: 338-348.

831 Muscarella, D. E., and V. M. Vogt, 1993 A mobile group-I intron from *Physarum polycephalum* can insert  
832 itself and induce point mutations in the nuclear ribosomal DNA of *Saccharomyces cerevisiae*.  
833 *Molecular and Cellular Biology* 13: 1023-1033.

834 Nielsen, H., and J. Engberg, 1985 Functional intron+ and intron- rDNA in the same macronucleus of the  
835 ciliate *Tetrahymena pigmentosa*. *Biochimica Et Biophysica Acta* 825: 30-38.

836 Osheim, Y. N., S. L. French, K. M. Keck, E. A. Champion, K. Spasov *et al.*, 2004 Pre-18S ribosomal RNA is  
837 structurally compacted into the SSU processome prior to being cleaved from nascent transcripts in  
838 *Saccharomyces cerevisiae*. *Mol Cell* 16: 943-954.

839 Parenteau, J., L. Maignon, M. Berthoumieux, M. Catala, V. Gagnon *et al.*, 2019 Introns are mediators of cell  
840 response to starvation. *Nature* 565: 612-617.

841 Pestov, D. G., and N. Shcherbik, 2012 Rapid cytoplasmic turnover of yeast ribosomes in response to  
842 rapamycin inhibition of TOR. *Mol Cell Biol* 32: 2135-2144.

843 Pfaffl, M. W., 2001 A new mathematical model for relative quantification in real-time RT-PCR. *Nucleic Acids*  
844 *Research* 29: e45.

845 Poverennaya, I. V., and M. A. Roytberg, 2020 Spliceosomal Introns: Features, Functions, and Evolution.  
846 *Biochemistry-Moscow* 85: 725-734.

847 Protocols, C. S. H., 2006 LB (Luria-Bertani) liquid medium, pp. [pdb.rec8141](#).

848 Protocols, C. S. H., 2010 Yeast extract-peptone-dextrose growth medium (YEED), pp. [pdb.rec12161](#).

849 Reeb, V., P. Haugen, D. Bhattacharya and F. Lutzoni, 2007 Evolution of Pleopsidium (Lichenized  
850 ascomycota) S943 group I introns and the phylogeography of an intron-encoded putative homing  
851 endonuclease. *Journal of Molecular Evolution* 64: 285-298.

852 Ryan, O. W., and J. H. D. Cate, 2014 Chapter Twenty-Two - Multiplex Engineering of Industrial Yeast  
853 Genomes Using CRISPRm, pp. 473-489 in *Methods in Enzymology*, edited by J. A. Doudna and E. J.  
854 Sontheimer. Academic Press.

855 Ryan, O. W., S. Poddar and J. H. D. Cate, 2016 CRISPR-Cas9 Genome Engineering in *Saccharomyces*  
856 *cerevisiae* Cells. *Cold Spring Harbor Protocols* 2016: [pdb.prot086827](#).

857 Salim, D., W. D. Bradford, A. Freeland, G. Cady, J. M. Wang *et al.*, 2017 DNA replication stress restricts  
858 ribosomal DNA copy number. *Plos Genetics* 13.

859 Sanchez, J. C., A. Ollodart, C. R. L. Large, C. Clough, G. M. Alvino *et al.*, 2019 Phenotypic and Genotypic  
860 Consequences of CRISPR/Cas9 Editing of the Replication Origins in the rDNA of *Saccharomyces*  
861 *cerevisiae*. *Genetics* 213: 229-249.

862 Stafford, G. A., and R. H. Morse, 1998 Mutations in the AF-2/hormone-binding domain of the chimeric  
863 activator GAL4. estrogen receptor.VP16 inhibit hormone-dependent transcriptional activation and  
864 chromatin remodeling in yeast. *Journal of Biological Chemistry* 273: 34240-34246.

865 Talkish, J., S. Biedka, J. Jakovljevic, J. Zhang, L. Tang *et al.*, 2016 Disruption of ribosome assembly in yeast  
866 blocks cotranscriptional pre-rRNA processing and affects the global hierarchy of ribosome  
867 biogenesis. *RNA* 22: 852-866.

868 Tapia, H., and D. E. Koshland, 2014 Trehalose Is a Versatile and Long-Lived Chaperone for Desiccation  
869 Tolerance. *Current Biology* 24: 2758-2766.

870 Tapia, H., L. Young, D. Fox, C. R. Bertozzi and D. Koshland, 2015 Increasing intracellular trehalose is  
871 sufficient to confer desiccation tolerance to *Saccharomyces cerevisiae*. *Proceedings of the National*  
872 *Academy of Sciences of the United States of America* 112: 6122-6127.

873 Tripathi, K., N. Matmati, W. J. Zheng, Y. A. Hannun and B. K. Mohanty, 2011 Cellular Morphogenesis Under  
874 Stress Is Influenced by the Sphingolipid Pathway Gene ISC1 and DNA Integrity Checkpoint Genes in  
875 *Saccharomyces cerevisiae*. *Genetics* 189: 533-547.

876 Venema, J., and D. Tollervey, 1999 Ribosome synthesis in *Saccharomyces cerevisiae*. *Annu Rev Genet* 33:  
877 261-311.

878 Wang, Y., X. Zhang, Q. Zhou, X. Zhang and J. Wei, 2015 Comparative transcriptome analysis of the lichen-  
879 forming fungus *Endocarpon pusillum* elucidates its drought adaptation mechanisms. *Science China*  
880 *Life Sciences* 58: 89-100.

881 Wang, Y. Y., X. L. Wei, Z. Y. Bian, J. C. Wei and J. R. Xu, 2020 Coregulation of dimorphism and symbiosis by  
882 cyclic AMP signaling in the lichenized fungus *Umbilicaria muhlenbergii*. *Proceedings of the National*  
883 *Academy of Sciences of the United States of America* 117: 23847-23858.

884 Welch, A. Z., P. A. Gibney, D. Botstein and D. E. Koshland, 2013 TOR and RAS pathways regulate desiccation  
885 tolerance in *Saccharomyces cerevisiae*. *Molecular Biology of the Cell* 24: 115-128.

886 Welch, A. Z., and D. E. Koshland, 2013 A simple colony-formation assay in liquid medium, termed  
887 'tadpoling', provides a sensitive measure of *Saccharomyces cerevisiae* culture viability. *Yeast* 30:  
888 501-509.

889 Zhang, Y., Z. Yu, X. Fu and C. Liang, 2002 Noc3p, a bHLH protein, plays an integral role in the initiation of  
890 DNA replication in budding yeast. *Cell* 109: 849-860.

891
